# Supplementary material for: Ru(ii)-dmso complexes containing azole-based ligands: synthesis, linkage isomerism and catalytic behaviour
Source: Royal Society of Chemistry journal article supplement (doi:10.1039/c5dt04376j), 2016-01-01

## Supplementary Information

# Ru(II)-dmsO Complexes containing Azole-based Ligands: Synthesis, Linkage Isomerism and Catalytic Behaviour

Íngrid Ferrer, Xavier Fontrodona, Montserrat Rodríguez\* and Isabel Romero\*

Departament de Química and Serveis Tècnics de Recerca, Universitat de Girona, Campus de Montilivi, E-17071 Girona, Spain.

Keywords: ruthenium /dmsO complexes/ azole-based ligands / linkage isomerism / hydration catalysis.

## Table of Contents

**Table S1.** Crystallographic data for complexes **2-5** and **6'**.

**Table S2.** Formulas used for the calculation of rate (*k*) and equilibrium (*K*) constants.

**Scheme S1.** Ru-dmsO complexes gathered in entries 3-6 of Table 2.

**Figure S1.** NMR spectra of **2**, 400 MHz, CD<sub>2</sub>Cl<sub>2</sub>: a) <sup>1</sup>H-NMR; b) <sup>13</sup>C-NMR; c) COSY; d) NOESY; e) <sup>1</sup>H-<sup>13</sup>C HSQC, f) <sup>1</sup>H-<sup>13</sup>C HMBC

**Figure S2.** NMR spectra of **3**, 300 MHz, CD<sub>2</sub>Cl<sub>2</sub>: a) <sup>1</sup>H-NMR; b) <sup>13</sup>C-NMR; c) COSY; d) NOESY; e) <sup>1</sup>H-<sup>13</sup>C HSQC, f) <sup>1</sup>H-<sup>13</sup>C HMBC

**Figure S3.** NMR spectra of **4**, 300 MHz, CD<sub>2</sub>Cl<sub>2</sub>: a) <sup>1</sup>H-NMR; b) <sup>13</sup>C-NMR; c) COSY; d) NOESY; e) <sup>1</sup>H-<sup>13</sup>C HSQC, f) <sup>1</sup>H-<sup>13</sup>C HMBC

**Figure S4.** NMR spectra of **5**, 300 MHz, CD<sub>2</sub>Cl<sub>2</sub>: a) <sup>1</sup>H-NMR; b) <sup>13</sup>C-NMR; c) COSY; d) NOESY; e) <sup>1</sup>H-<sup>13</sup>C HSQC, f) <sup>1</sup>H-<sup>13</sup>C HMBC, g) <sup>1</sup>H-NMR with presence of the minor isomer.

**Figure S5.** UV-visible spectra of **2** (blue), **3** (green), **4** (grey) and **5** (red) in CH<sub>2</sub>Cl<sub>2</sub>

**Figure S6.** CV of a) **3** (blue), **4** (black) and **5** (orange) in CH<sub>3</sub>CN + 0.1 M TBAH.

**Figure S7.** CV registered in CH<sub>2</sub>Cl<sub>2</sub> (TBAH, 0.1M) vs Ag/AgCl starting the scanning potential at *E*<sub>init</sub> = 0.6 for **2** and 0 V for **6** at scan rates between 0.20 and 8 V/s (equilibration time = 2 s). a) complex **2**, b) complex **6**.

**Figure S8.** Plot of *i*<sub>C1</sub>/*i*<sub>C2</sub> vs. 1/*v* to obtain *K*<sup>III</sup><sub>O→S</sub> for complex **2**.

**Figure S9.** Plot of *i*<sub>C1</sub>/*i*<sub>C2</sub> vs. 1/*v* to obtain *K*<sup>III</sup><sub>O→S</sub> for complex **6**.

**Figure S10.** Plot of *v*<sup>1/2</sup> vs. *i*<sub>d</sub>/*i*<sub>k</sub> to obtain *k*<sup>III</sup><sub>S→O</sub> and *k*<sup>III</sup><sub>O→S</sub> for complex **2**.

**Figure S11.** Plot of *v*<sup>1/2</sup> vs. *i*<sub>d</sub>/*i*<sub>k</sub> to obtain *k*<sup>III</sup><sub>S→O</sub> and *k*<sup>III</sup><sub>O→S</sub> for complex **6**.

**Figure S12.** Plot of ln(*i*<sub>a1</sub>/*v*<sup>1/2</sup>) vs. 1/*v* to obtain *k*<sup>II</sup><sub>O→S</sub> for complex **2**.

**Figure S13.** Plot of ln(*i*<sub>a1</sub>/*v*<sup>1/2</sup>) vs. 1/*v* to obtain *k*<sup>II</sup><sub>O→S</sub> for complex **6**.

**Figure S14.** NMR spectra of **2** in CD<sub>3</sub>CN after irradiation at *t* = a) 0, b) 45 and c) 90 minutes.

**Figure S15.** CV of **2** in CH<sub>3</sub>CN + 0.1 M TBAH after irradiation during 90 minutes.

**Figure S16.** CV of **6'** in CH<sub>2</sub>Cl<sub>2</sub> + 0.1 M TBAH.

**Figure S17.** Successive UV-visible spectra obtained after irradiation of a solution of complex **6** in CHCl<sub>3</sub> during 60 min, to generate complex **6'**.

**Figure S18.** Successive UV-visible spectra obtained after irradiation of a solution of complex **2** in CHCl<sub>3</sub> during 24 h, to generate complex **2''**.

**Figure S19.** CV of **2''** in CH<sub>2</sub>Cl<sub>2</sub> + 0.1 M TBAH after irradiation.

**Figure S20.** UV-vis monitoring of complex **2** in water at 80°C: main figure, spectra registered for 30 minutes; inset, evolution of the band at 516 nm up to 150 minutes.

**Figure S21.** Red, <sup>1</sup>H-NMR spectrum of complex **2** registered in D<sub>2</sub>O. Black, <sup>1</sup>H-NMR spectrum of complex **2** after 150 minutes in water solution at 80°C.

**Table S1.** Crystallographic data for complexes **2-5** and **6'**.

|                                          | <b>2</b>                                                                                          | <b>3</b>                                                                                         | <b>4</b>                                                                                                         | <b>5</b>                                                                                            | <b>6'</b>                                                               |
|------------------------------------------|---------------------------------------------------------------------------------------------------|--------------------------------------------------------------------------------------------------|------------------------------------------------------------------------------------------------------------------|-----------------------------------------------------------------------------------------------------|-------------------------------------------------------------------------|
| Empirical formula                        | C <sub>10</sub> H <sub>24</sub> Cl <sub>2</sub> N <sub>2</sub> O <sub>3</sub><br>RuS <sub>3</sub> | C <sub>9</sub> H <sub>21</sub> Cl <sub>2</sub> N <sub>3</sub> O <sub>5</sub><br>RuS <sub>3</sub> | C <sub>10</sub> H <sub>23</sub> Cl <sub>2</sub> F <sub>3</sub> N <sub>2</sub> O <sub>4</sub><br>RuS <sub>3</sub> | C <sub>13</sub> H <sub>24</sub> BrCl <sub>2</sub> N <sub>2</sub> O <sub>4</sub><br>RuS <sub>3</sub> | C <sub>11</sub> H <sub>15</sub> Cl <sub>3</sub> N <sub>3</sub> ORu<br>S |
| Formula weight                           | 488.46                                                                                            | 519.44                                                                                           | 560.45                                                                                                           | 620.40                                                                                              | 515.64                                                                  |
| Crystal system                           | Monoclinic                                                                                        | Monoclinic                                                                                       | Monoclinic                                                                                                       | Monoclinic                                                                                          | Monoclinic                                                              |
| Space group                              | P2(1)/c                                                                                           | P21/n                                                                                            | P 21/n                                                                                                           | P2(1)/c                                                                                             | P21/c                                                                   |
| a [Å]                                    | 8.8684(17)                                                                                        | 8.396(7)                                                                                         | 8.739(3)                                                                                                         | 12.493(6)                                                                                           | 9.969(5)                                                                |
| b [Å]                                    | 14.240(3)                                                                                         | 15.783(13)                                                                                       | 23.299(7)                                                                                                        | 13.943(7)                                                                                           | 16.673(8)                                                               |
| c [Å]                                    | 15.809(3)                                                                                         | 14.403(12)                                                                                       | 10.690(3)                                                                                                        | 16.522(6)                                                                                           | 11.326(6)                                                               |
| α [°]                                    | 90                                                                                                | 90                                                                                               | 90                                                                                                               | 90                                                                                                  | 90                                                                      |
| β [°]                                    | 102.331(3)                                                                                        | 105.773(13)                                                                                      | 93.393(6)                                                                                                        | 130.27(2)                                                                                           | 96.414 (7)                                                              |
| γ [°]                                    | 90                                                                                                | 90                                                                                               | 90                                                                                                               | 90                                                                                                  | 90                                                                      |
| V [Å <sup>3</sup> ]                      | 1950.3(6)                                                                                         | 1837(3)                                                                                          | 2172.9(12)                                                                                                       | 2195.9(17)                                                                                          | 1870.8(16)                                                              |
| Formula Units/<br>cell                   | 4                                                                                                 | 4                                                                                                | 4                                                                                                                | 4                                                                                                   | 4                                                                       |
| Temp. [K]                                | 298(2)                                                                                            | 298(2)                                                                                           | 298(2)                                                                                                           | 298(2)                                                                                              | 100(2)                                                                  |
| ρ <sub>calc</sub> , [Mg/m <sup>3</sup> ] | 1.664                                                                                             | 1.878                                                                                            | 1.713                                                                                                            | 1.877                                                                                               | 1.831                                                                   |
| μ [mm <sup>-1</sup> ]                    | 1.407                                                                                             | 1.509                                                                                            | 1.297                                                                                                            | 3.083                                                                                               | 1.665                                                                   |
| Final R indices,<br>[I>2σ(I)]            | R1=0.0256<br>wR2=0.0657                                                                           | R1=0.0237<br>wR2=0.0608                                                                          | R1=0.0390<br>wR2=0.1193                                                                                          | R1=0.0387<br>wR2=0.0985                                                                             | R1 = 0.0400<br>wR2 = 0.1022                                             |
| R indices [all<br>data]                  | R1=0.0298<br>wR2=0.0681                                                                           | R1=0.0259<br>wR2=0.0626                                                                          | R1=0.0447<br>wR2=0.1229                                                                                          | R1=0.0523<br>wR2=0.1052                                                                             | R1 = 0.0524<br>wR2 = 0.1111                                             |

$$R_1 = \frac{\sum ||F_o| - |F_c||}{\sum |F_o|}$$

$$wR_2 = \left[ \frac{\sum \{w(F_o^2 - F_c^2)^2\}}{\sum \{w(F_o^2)^2\}} \right]^{1/2}, \text{ where } w = 1/[\sigma^2(F_o^2) + (0.0042P)^2] \text{ and } P = (F_o^2 + 2F_c^2)$$

**Table S2.** Formulas used for the calculation of rate (k) and equilibrium (K) constants.

| Equations                                                                                                                                                                                                                     | Description of parameters                                                                                                                                                                                                                                                                                                                                                                                                                                                                               |
|-------------------------------------------------------------------------------------------------------------------------------------------------------------------------------------------------------------------------------|---------------------------------------------------------------------------------------------------------------------------------------------------------------------------------------------------------------------------------------------------------------------------------------------------------------------------------------------------------------------------------------------------------------------------------------------------------------------------------------------------------|
| $\frac{i_{c1}}{i_{c2}} = a \cdot \frac{1}{v} + K_{O-S}^{III}$ <p style="text-align: center;"><b>(eq. 1)</b></p>                                                                                                               | <p><math>i_c</math> = cathodic peak intensity (A)</p> <p><math>a = RT/nF</math>, with:</p> <p style="padding-left: 20px;"><math>R</math> = Boltzmann constant (J/(K·mol))</p> <p style="padding-left: 20px;"><math>T</math> = temperature (K)</p> <p style="padding-left: 20px;"><math>n</math> = number of exchanged electrons</p> <p style="padding-left: 20px;"><math>F</math> = Faraday constant (A·s/mol)</p> <p><math>v</math> = scan rate (V/s)</p> <p><math>K</math> = equilibrium constant</p> |
| $\sqrt{v} = \frac{1}{\frac{0.471}{K_{O-S}^{III}} \cdot \sqrt{\frac{nFl}{RT}} \cdot \frac{i_d}{i_k}} - \frac{1.02}{\frac{0.471}{K_{O-S}^{III}} \cdot \sqrt{\frac{nFl}{RT}}}$ <p style="text-align: center;"><b>(eq. 2)</b></p> | <p><math>i_d</math> = diffusional current in the absence of a chemical reaction (= <math>i_{a1}</math>)</p> <p><math>i_k</math> = measured peak current (= <math>i_{c1}</math>)</p> <p><math>l = k_{O-S}^{III} + k_{S-O}^{III}</math></p>                                                                                                                                                                                                                                                               |
| $K^{II} = K^{III} + e^{\frac{F}{RT} \cdot (E_{Ru-S}^0 - E_{Ru-O}^0)}$ <p style="text-align: center;"><b>(eq. 3)</b></p>                                                                                                       | <p><math>E^0</math> = standard potential</p>                                                                                                                                                                                                                                                                                                                                                                                                                                                            |
| $\ln\left(\frac{i_{a1}}{\sqrt{v}}\right) = k_{O-S}^{II} \cdot \frac{1}{v} + b$ <p style="text-align: center;"><b>(eq. 4)</b></p>                                                                                              |                                                                                                                                                                                                                                                                                                                                                                                                                                                                                                         |

**Scheme S1.** Ru-dmsO complexes gathered in entries 3-6 of Table 2.

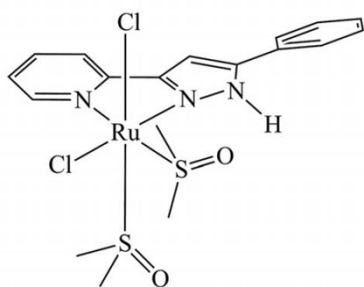

*cis,cis*-[RuCl<sub>2</sub>(H3p)(dmsO-S)<sub>2</sub>]

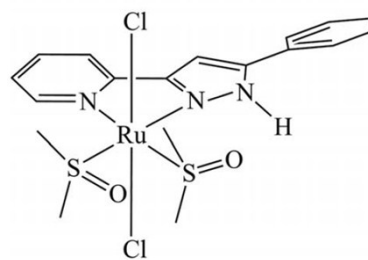

*trans,cis*-[RuCl<sub>2</sub>(H3p)(dmsO-S)<sub>2</sub>]

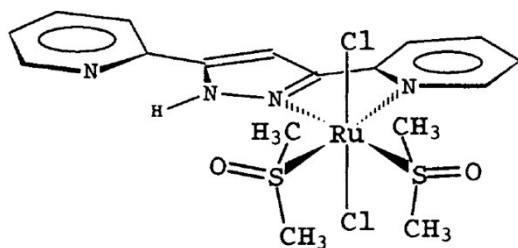

*trans,cis*-[RuCl<sub>2</sub>(bpp)(dmsO-S)<sub>2</sub>]

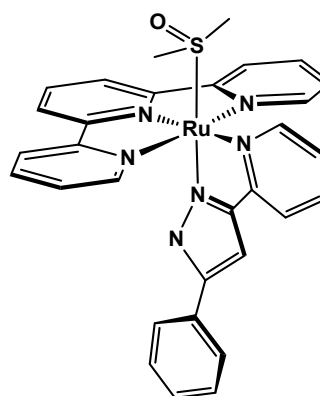

*out*-[Ru(L<sup>2</sup>)(trpy)(dmsO-S)]<sup>+</sup>

**Figure S1.** NMR spectra of **2**, 400 MHz, CD<sub>2</sub>Cl<sub>2</sub>: a) <sup>1</sup>H-NMR; b) <sup>13</sup>C-NMR; c) COSY; d) NOESY; e) <sup>1</sup>H-<sup>13</sup>C HSQC; f) <sup>1</sup>H-<sup>13</sup>C HMBC

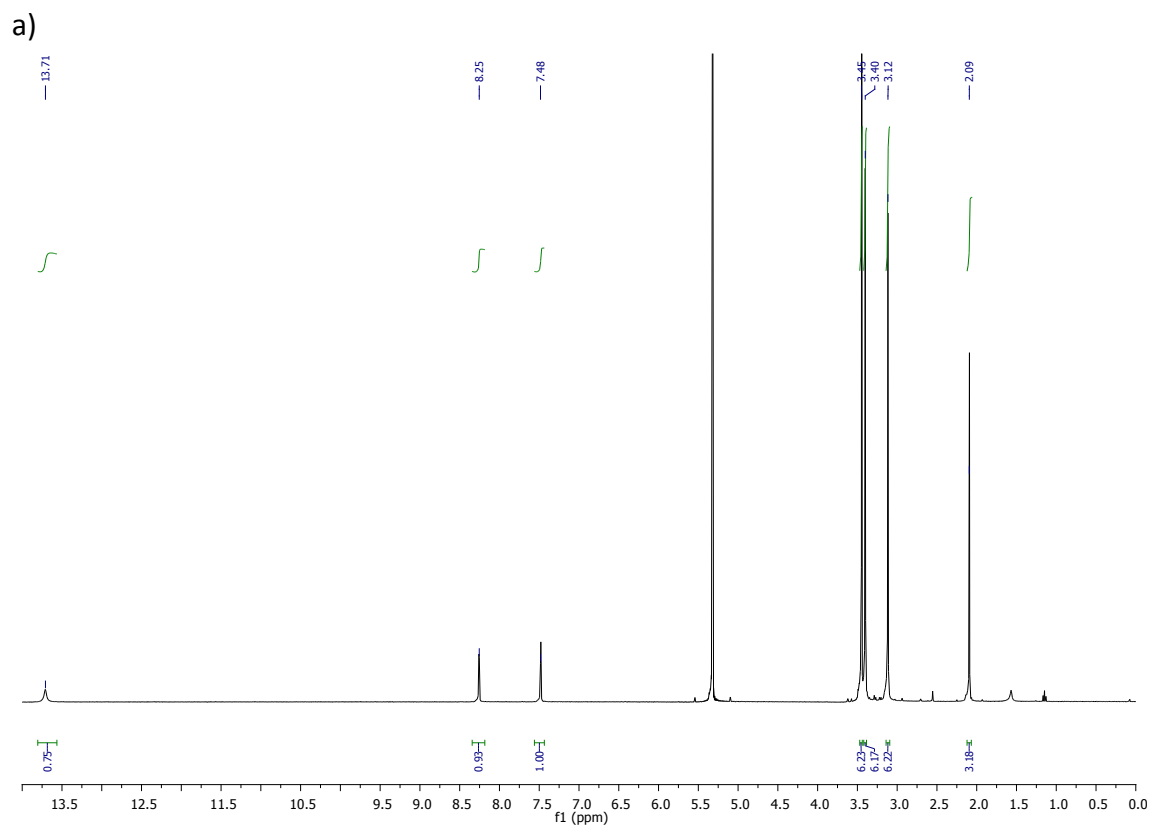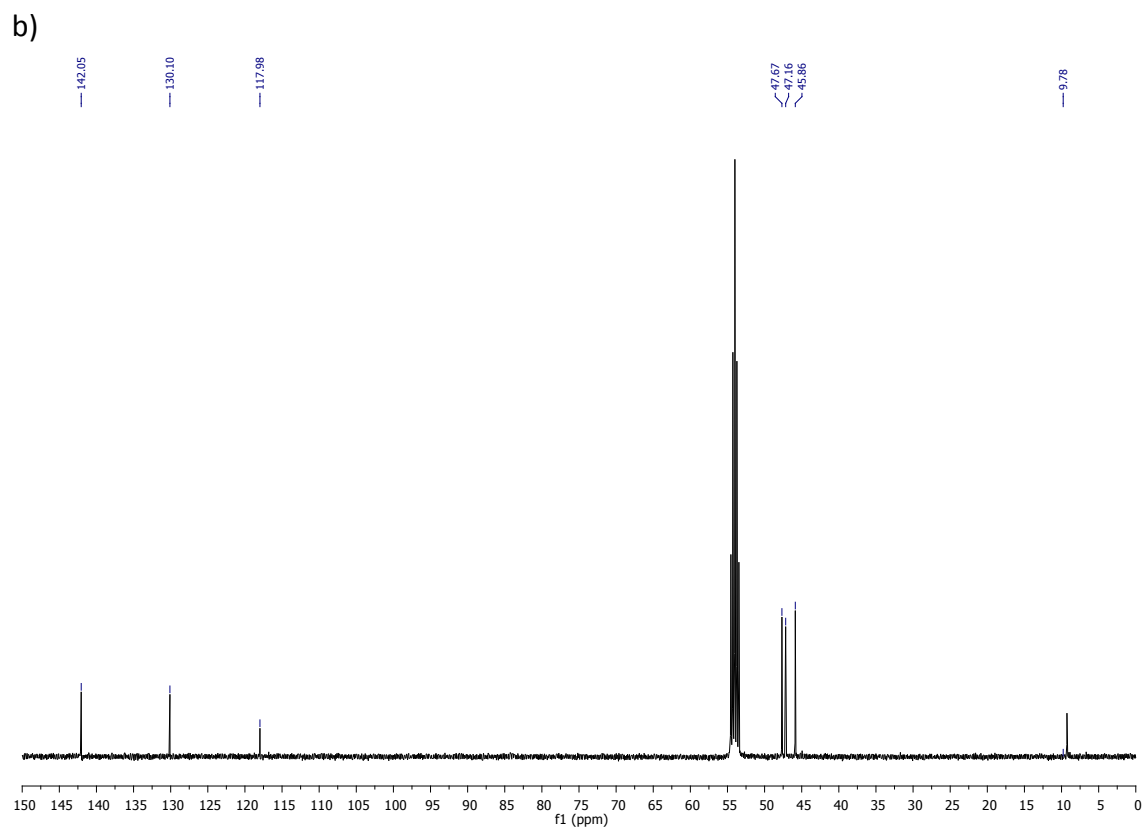

c)

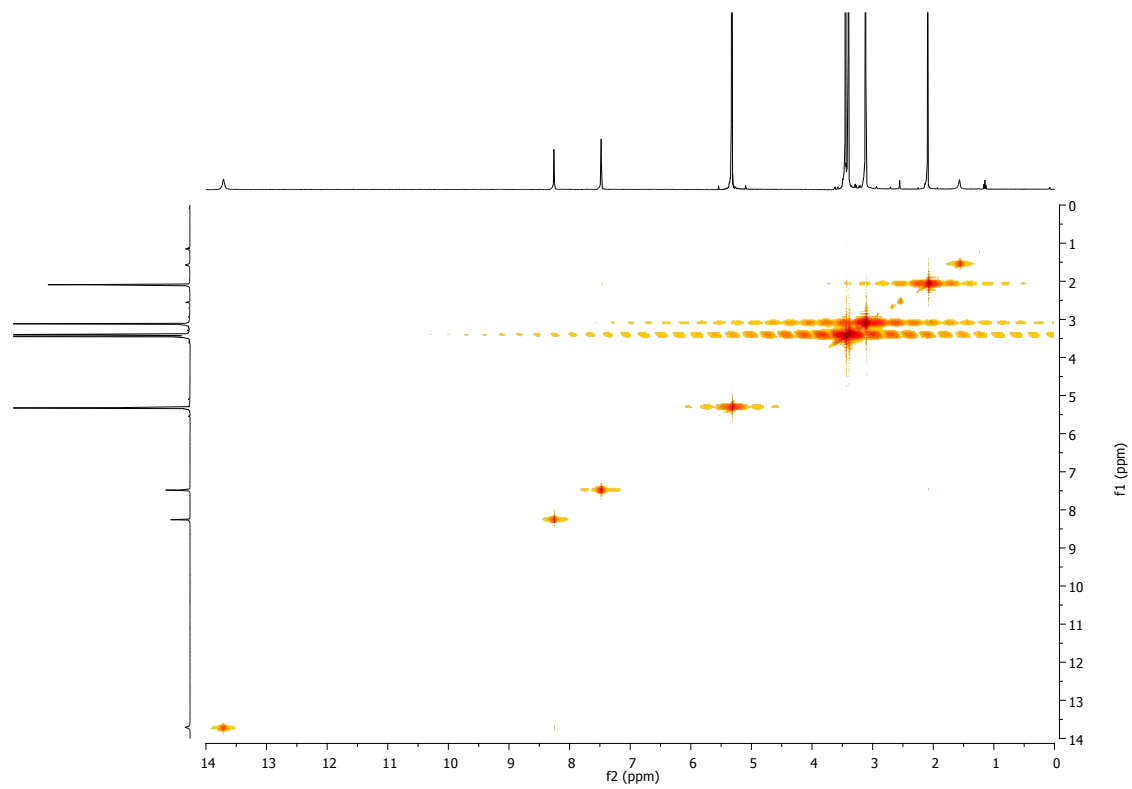

d)

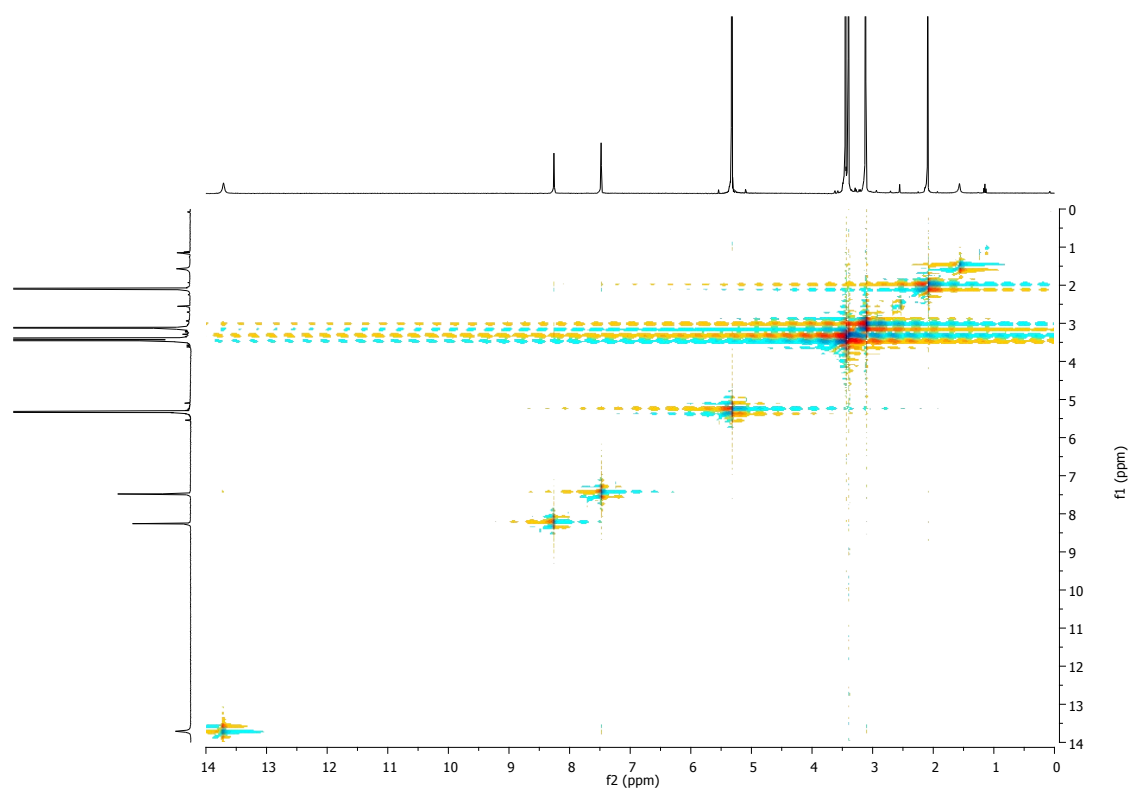

e)

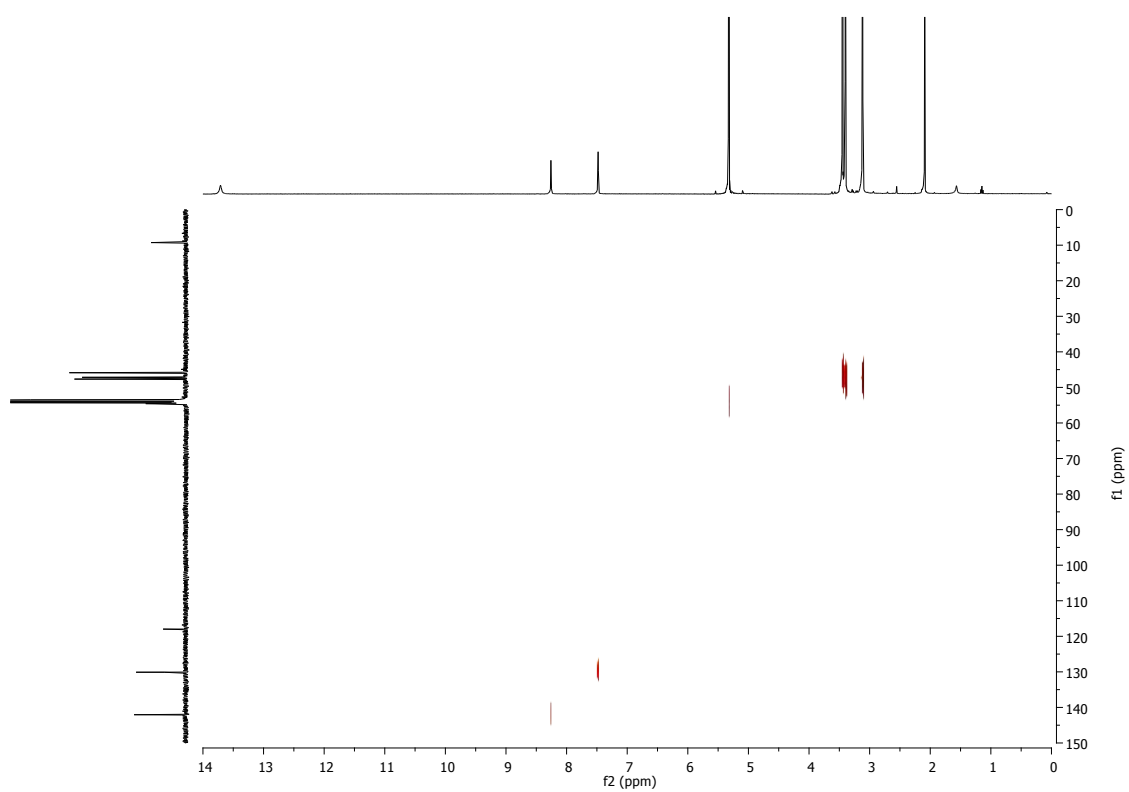

f)

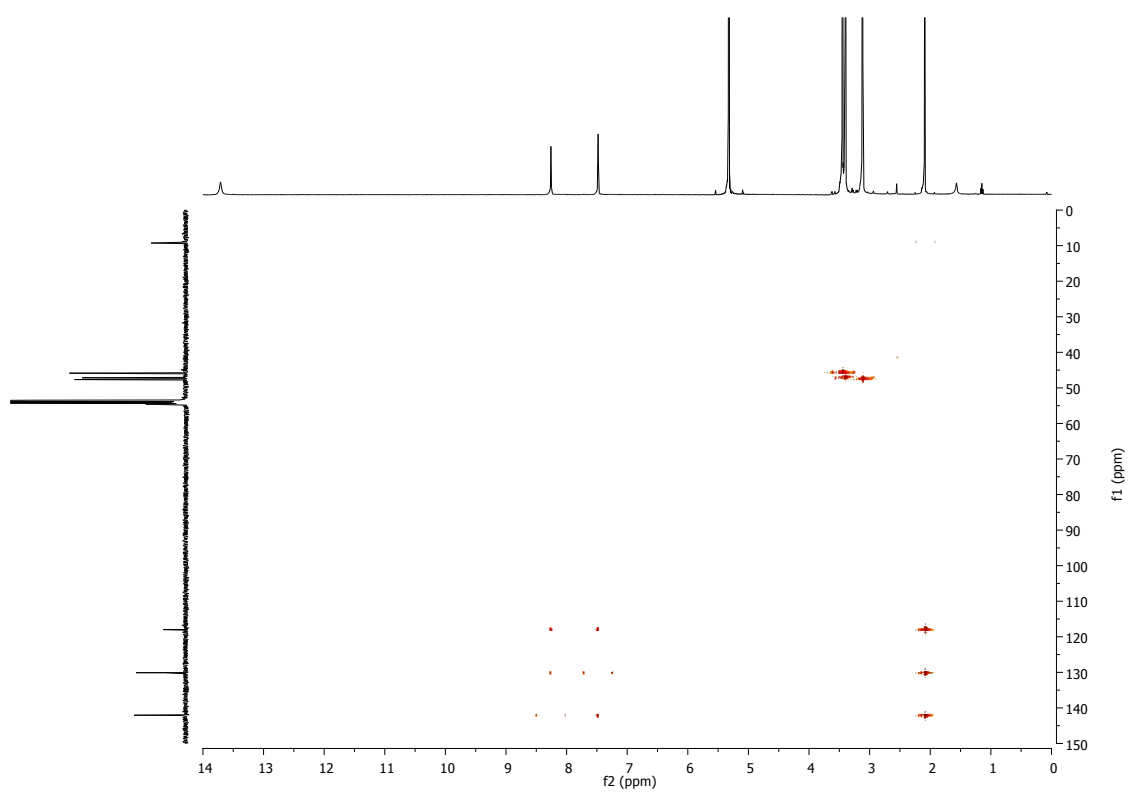

**Figure S2.** NMR spectra of **3**, 300 MHz, CD<sub>2</sub>Cl<sub>2</sub>: a) <sup>1</sup>H-NMR; b) <sup>13</sup>C-NMR; c) COSY; d) NOESY; e) <sup>1</sup>H-<sup>13</sup>C HSQC, f) <sup>1</sup>H-<sup>13</sup>C HMBC

a)

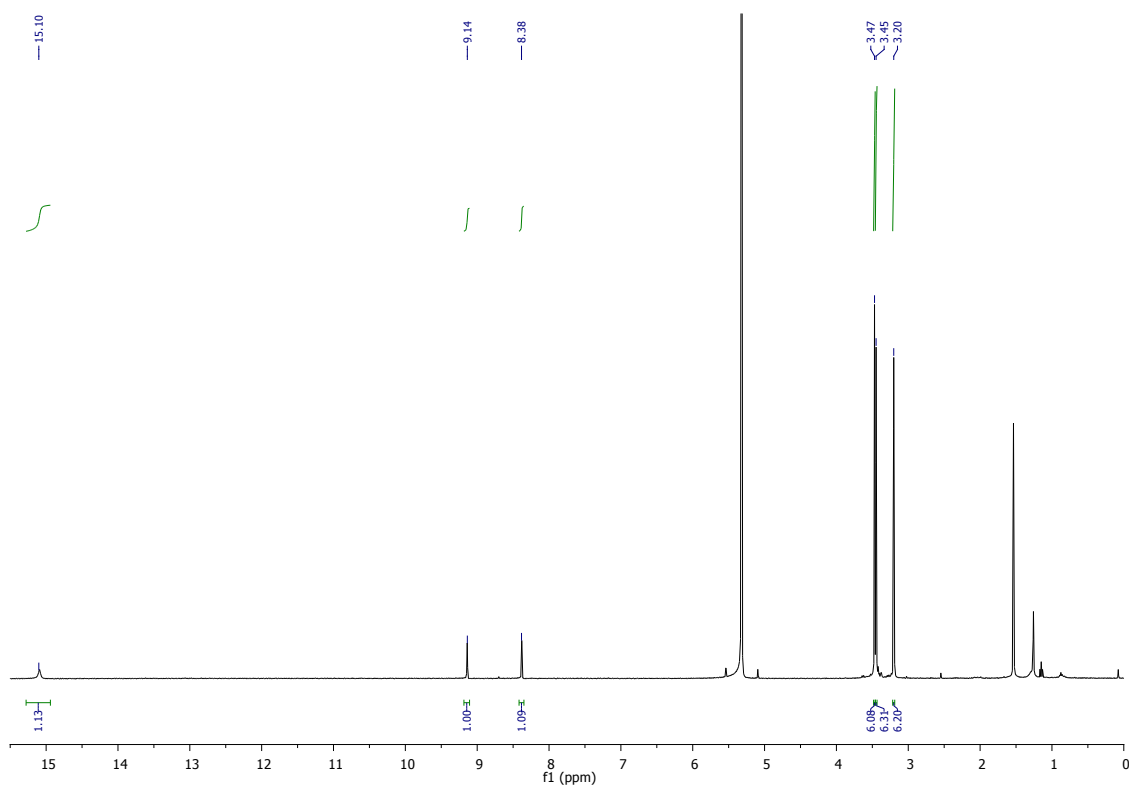

b)

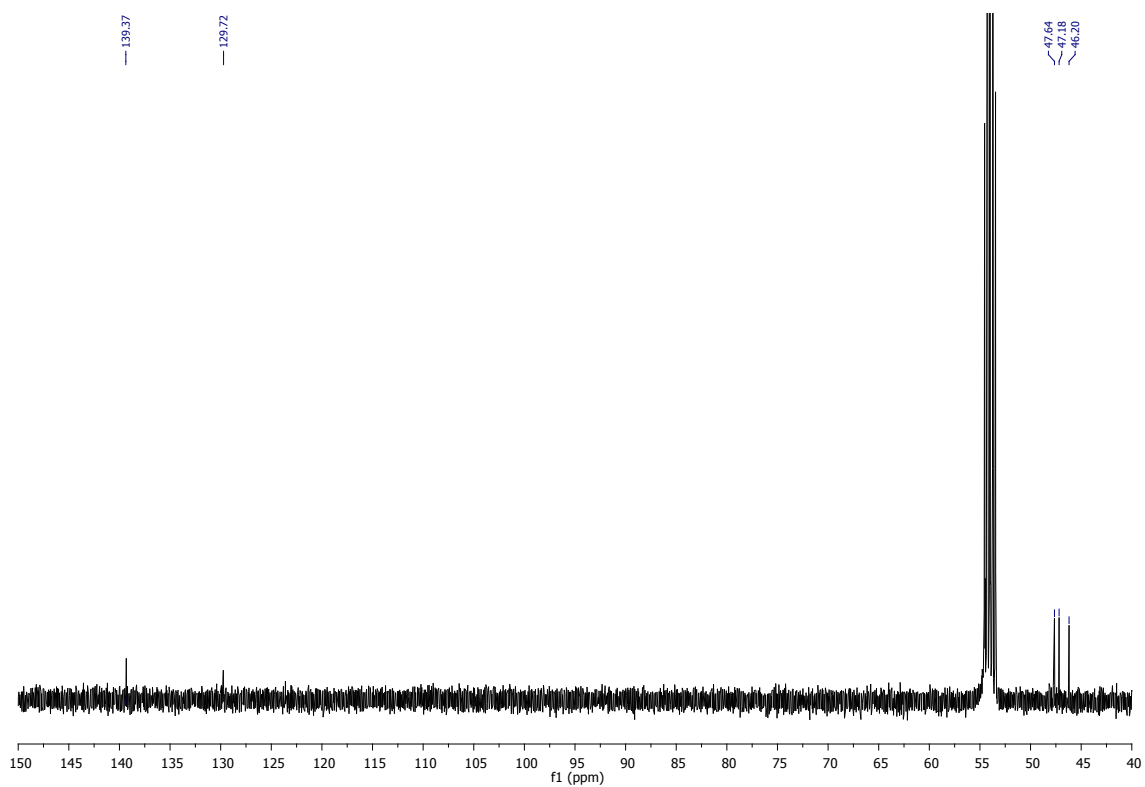



c)

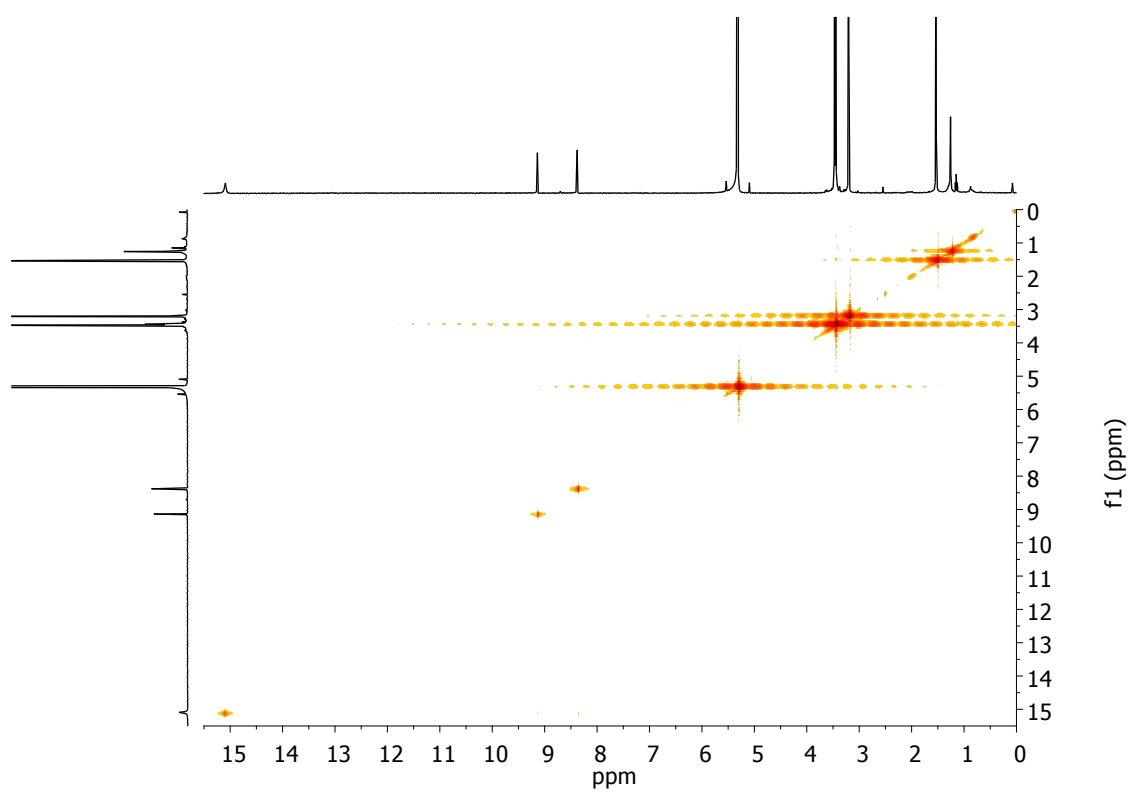

d)

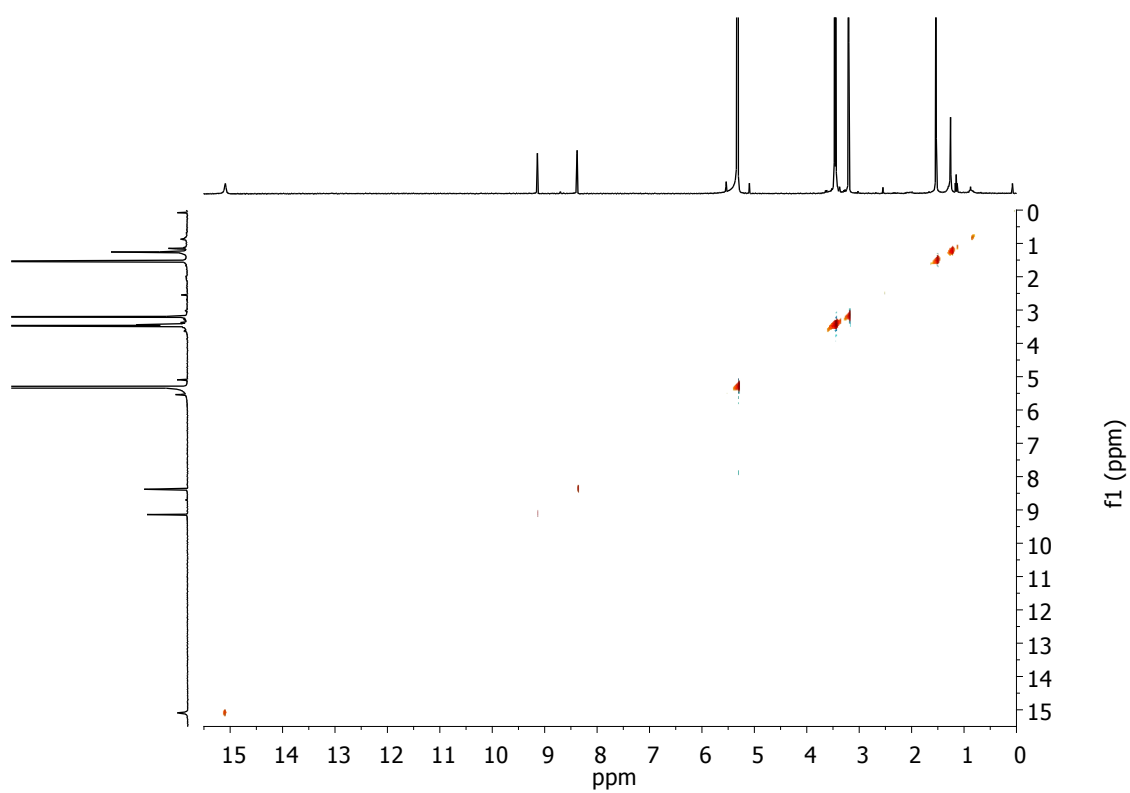

e)

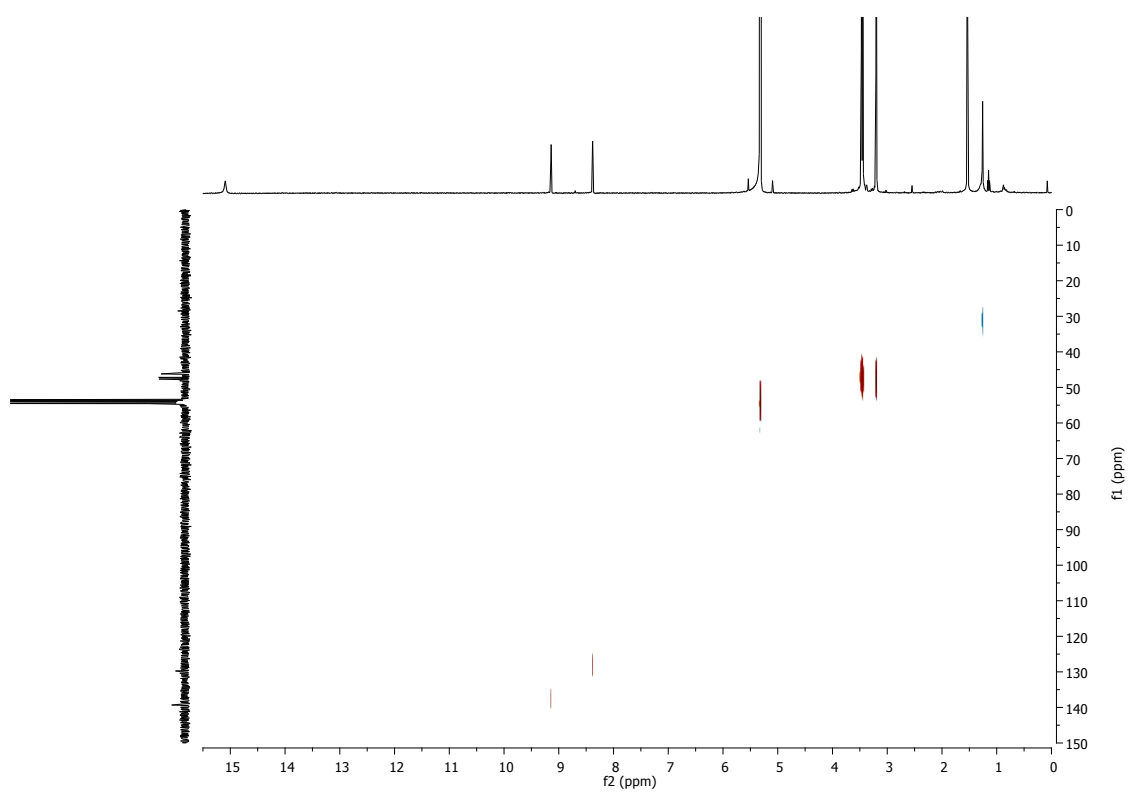

f)

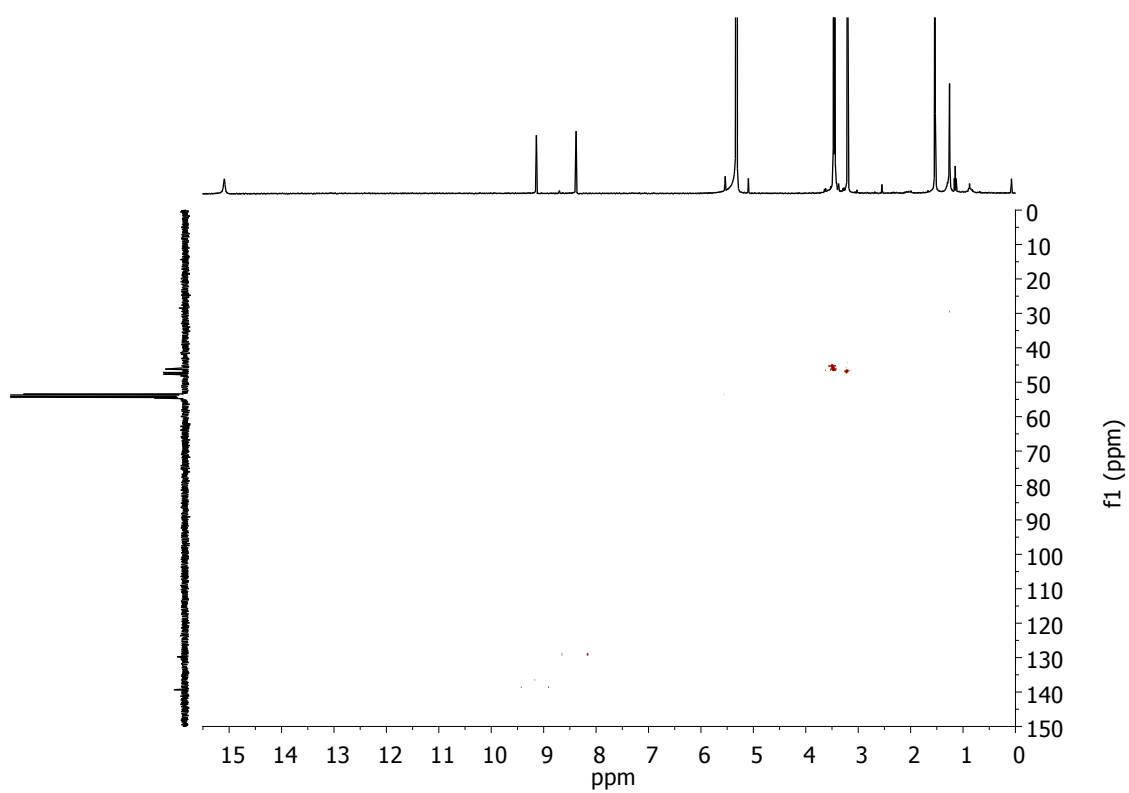

**Figure S3.** NMR spectra of **4**, 300 MHz, CD<sub>2</sub>Cl<sub>2</sub>: a) <sup>1</sup>H-NMR; b) <sup>13</sup>C-NMR; c) COSY; d) NOESY; e) <sup>1</sup>H-<sup>13</sup>C HSQC; f) <sup>1</sup>H-<sup>13</sup>C HMBC

a)

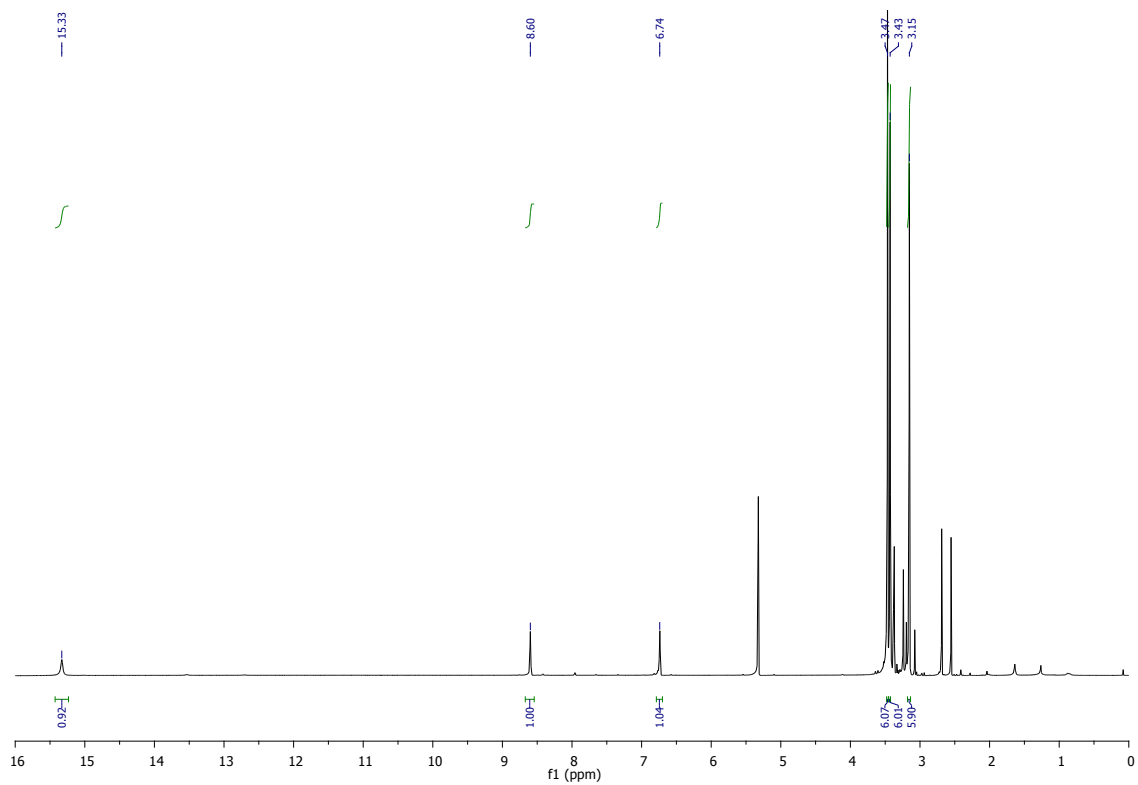

b)

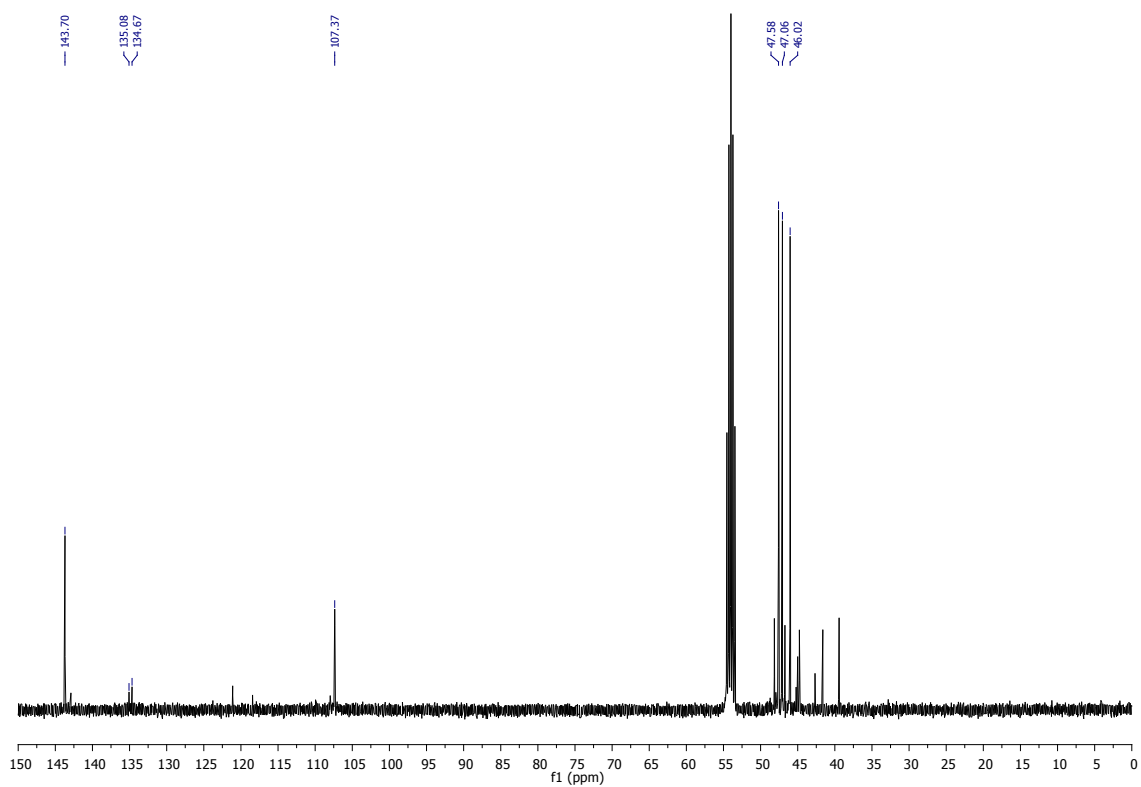

c)

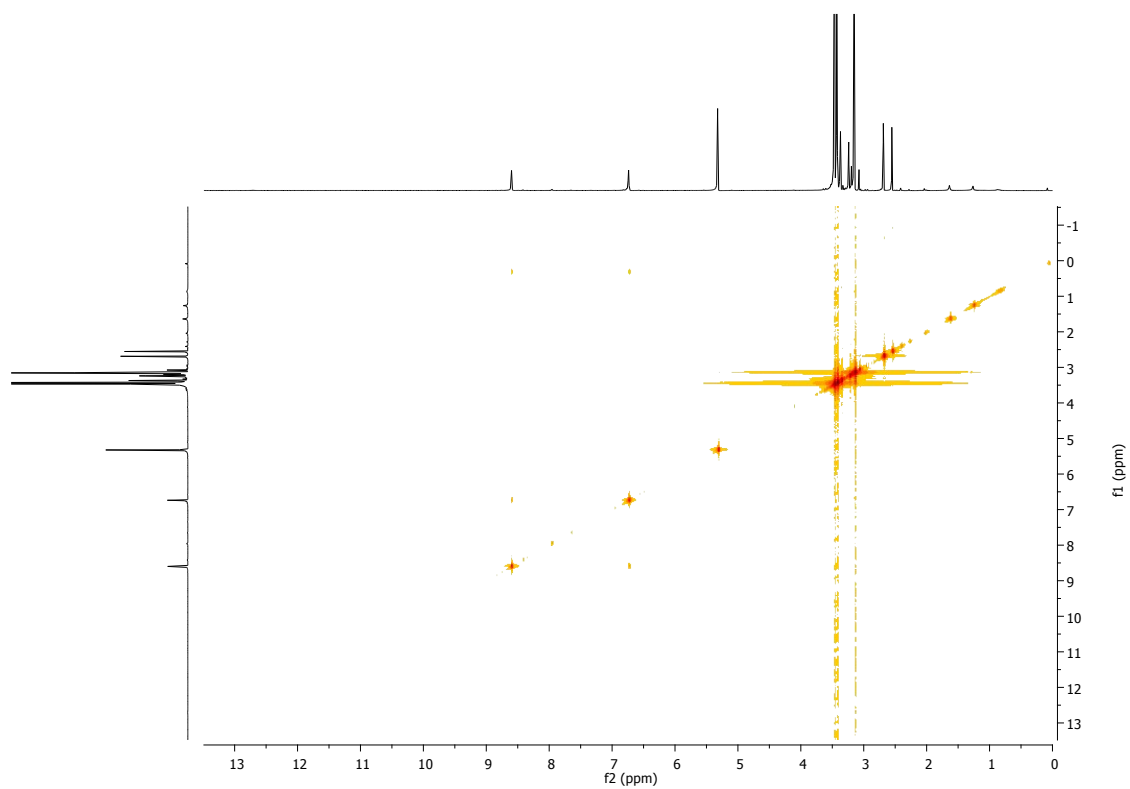

d)

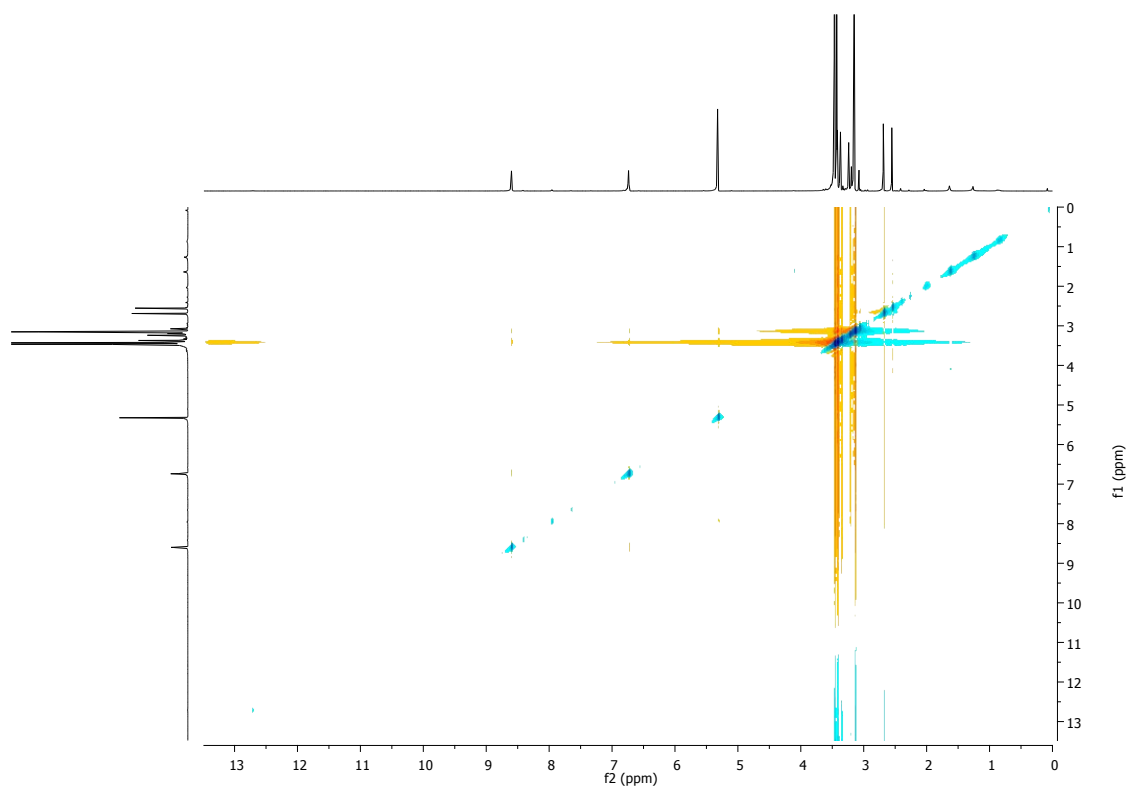

e)

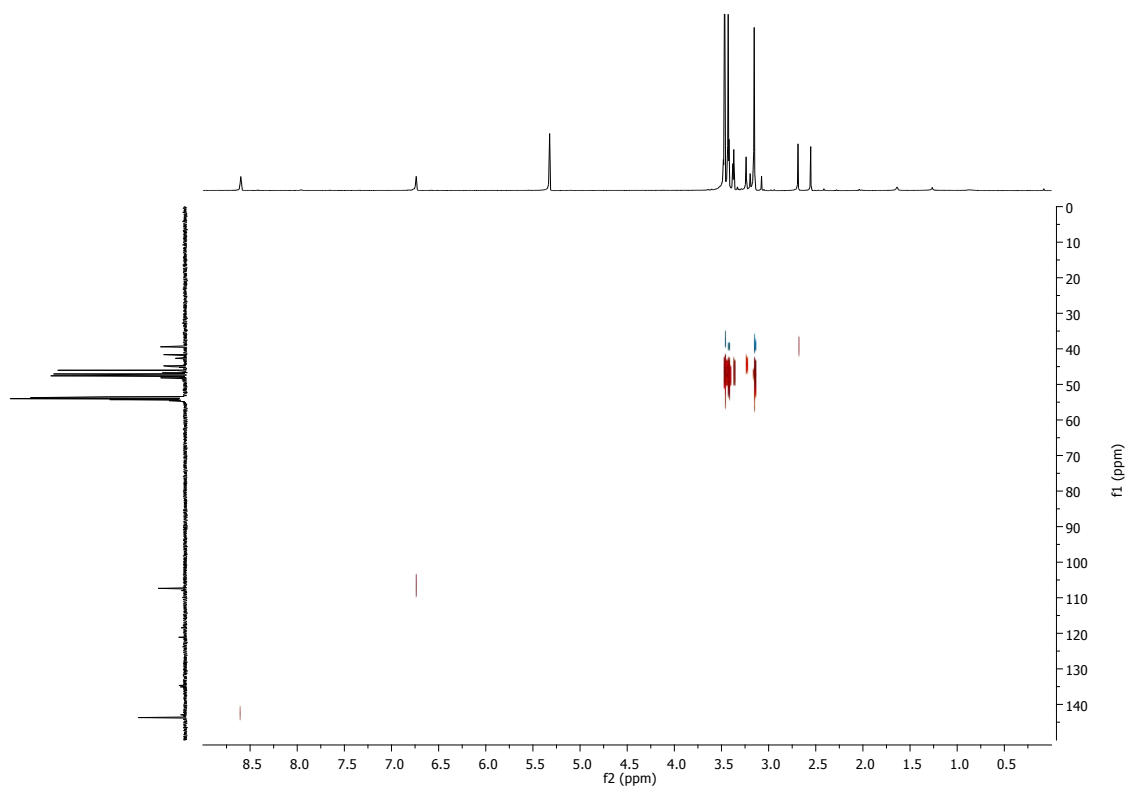

f)

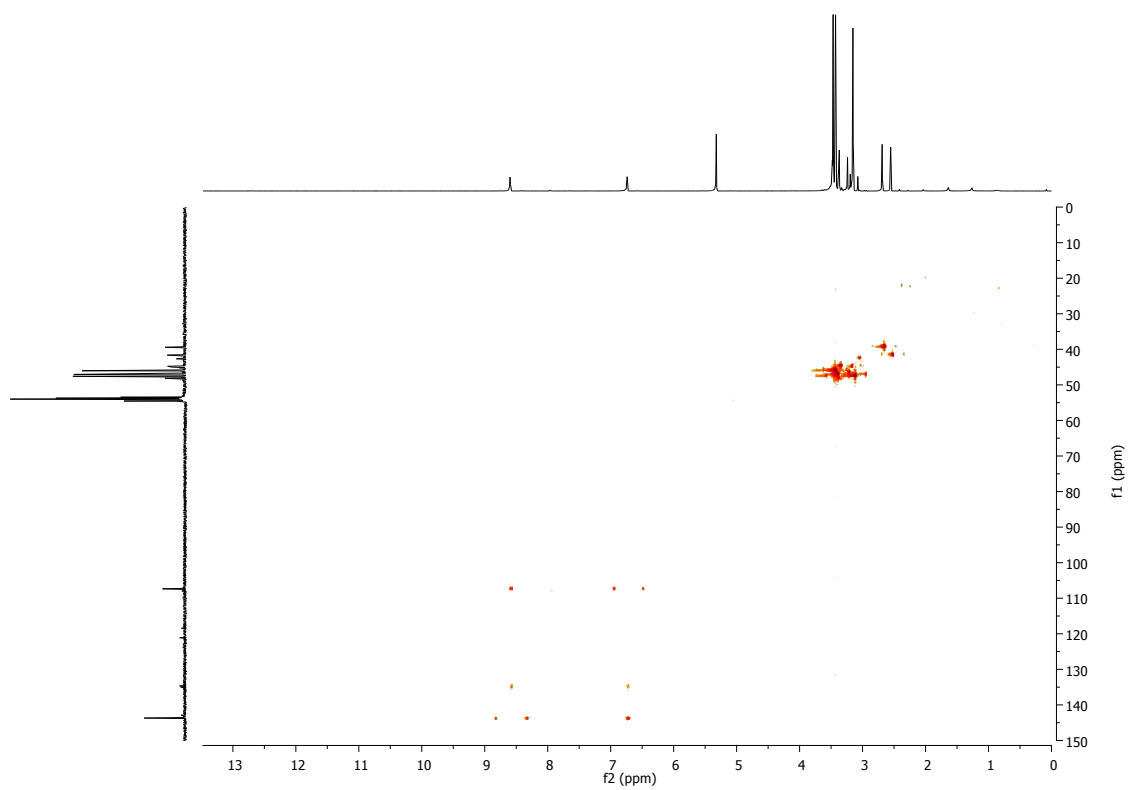

**Figure S4.** NMR spectra of **5**, 300 MHz, CD<sub>2</sub>Cl<sub>2</sub>: a) <sup>1</sup>H-NMR; b) <sup>13</sup>C-NMR; c) COSY; d) NOESY; e) <sup>1</sup>H-<sup>13</sup>C HSQC, f) <sup>1</sup>H-<sup>13</sup>C HMBC, g) <sup>1</sup>H-NMR with presence of the minor isomer.

a)

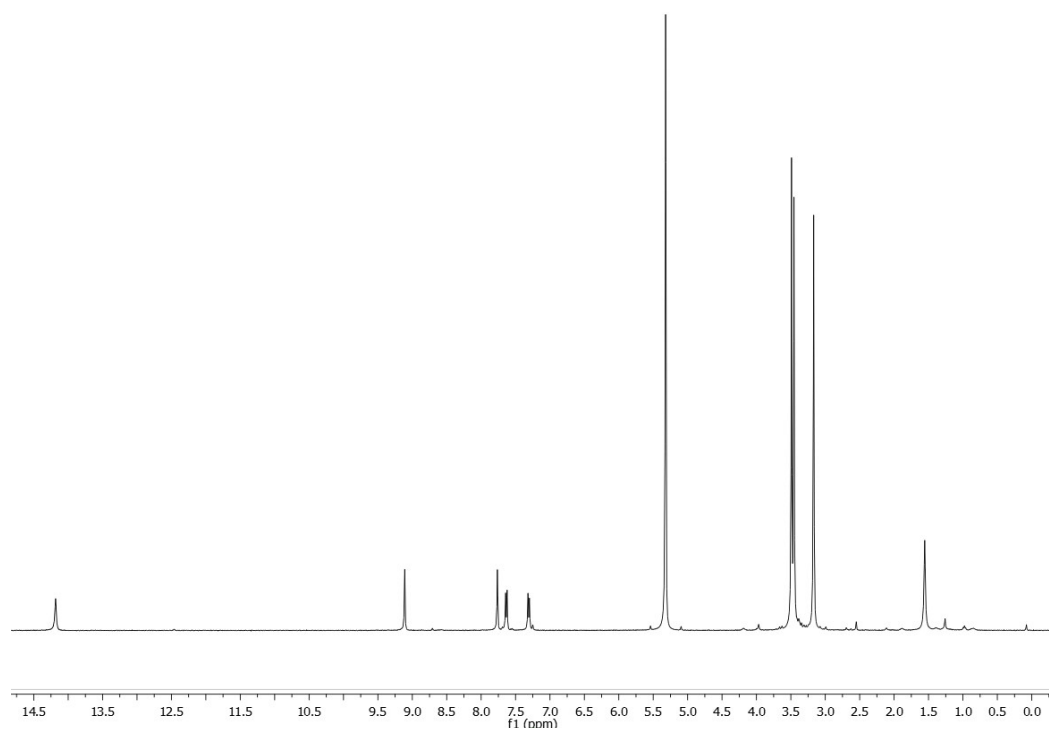

b)

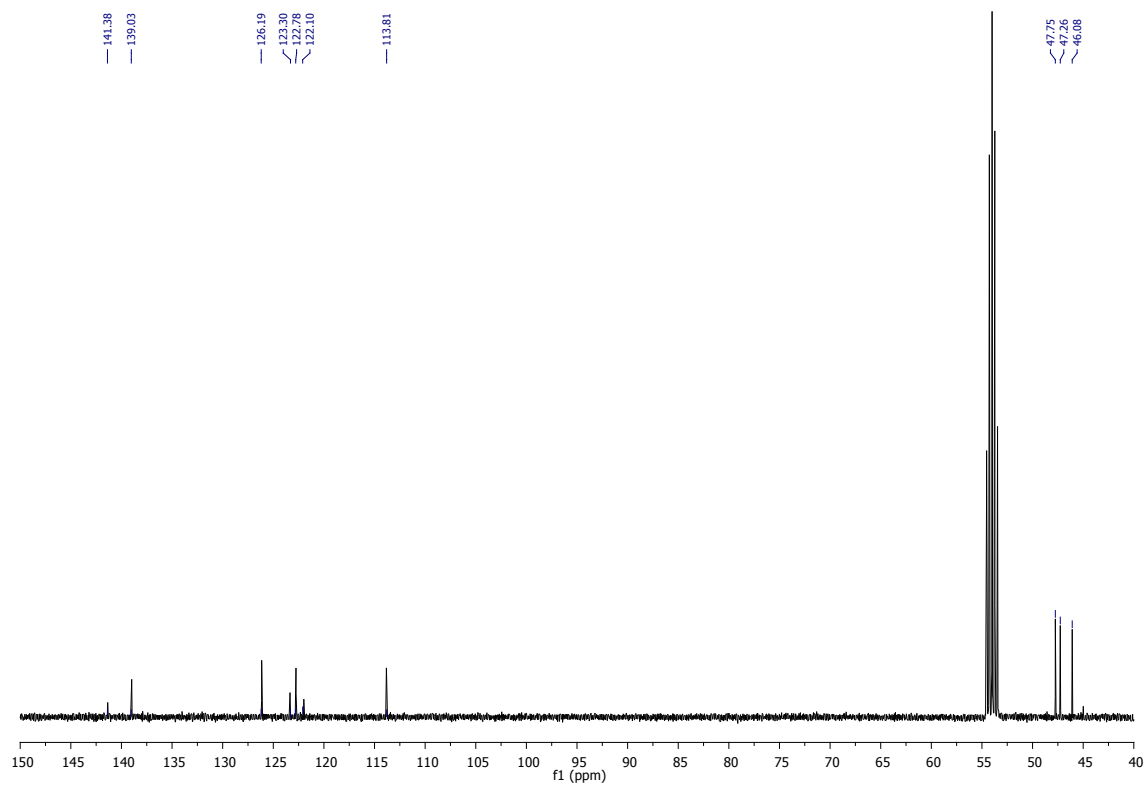

c)

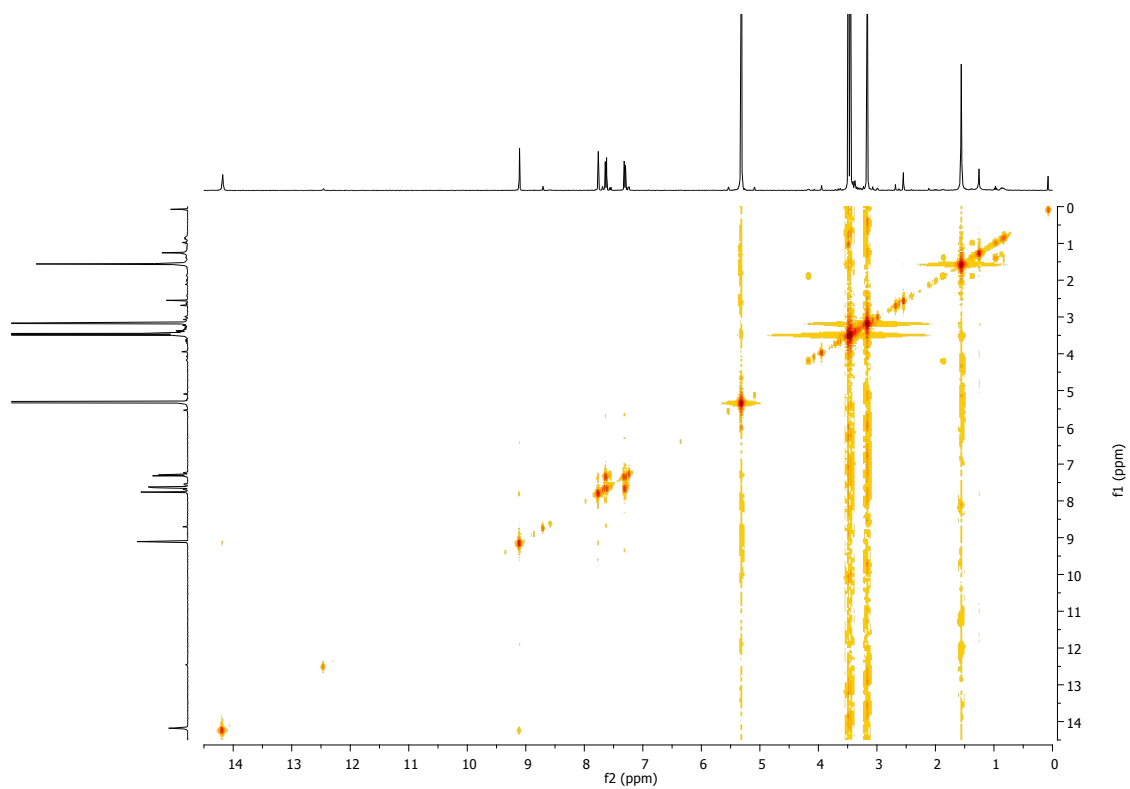

d)

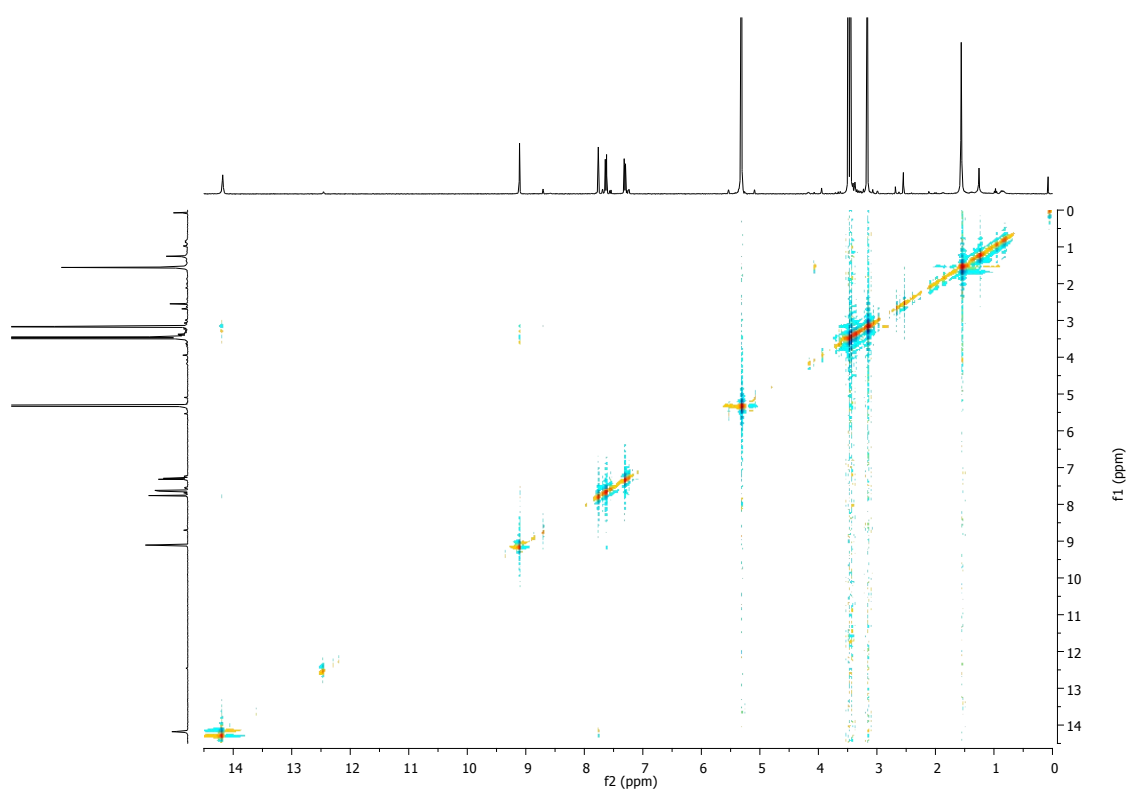

e)

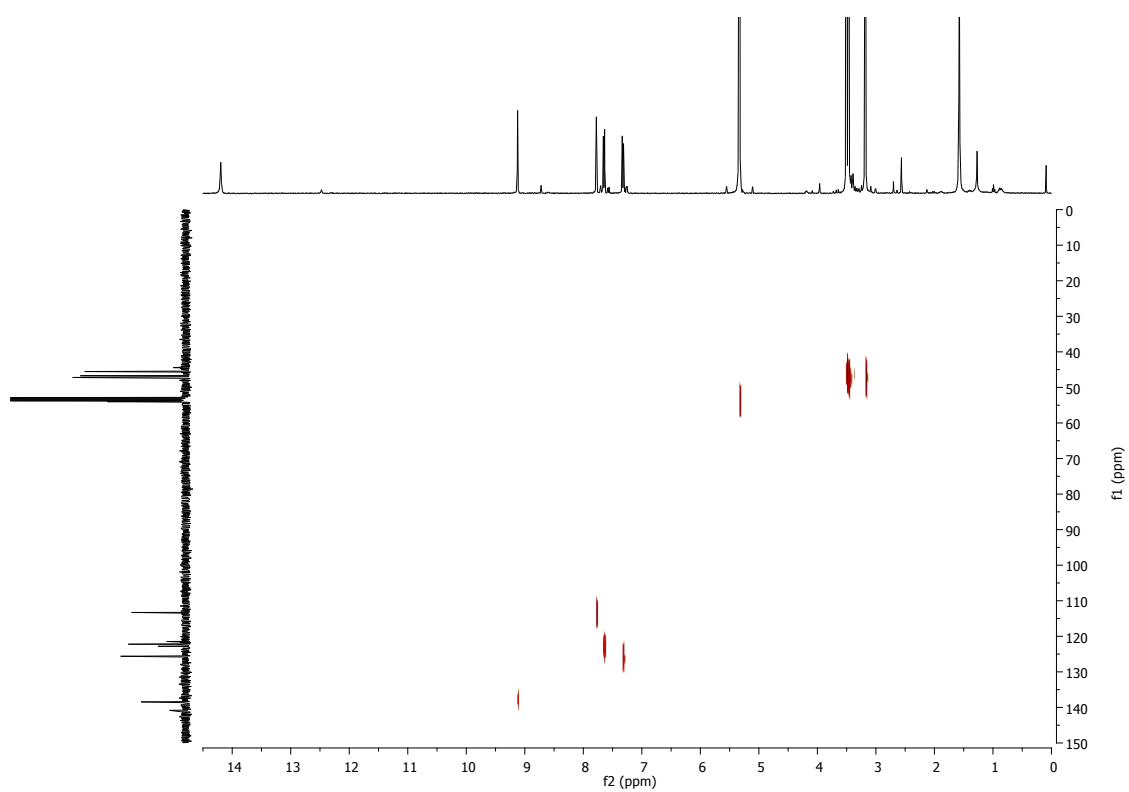

f)

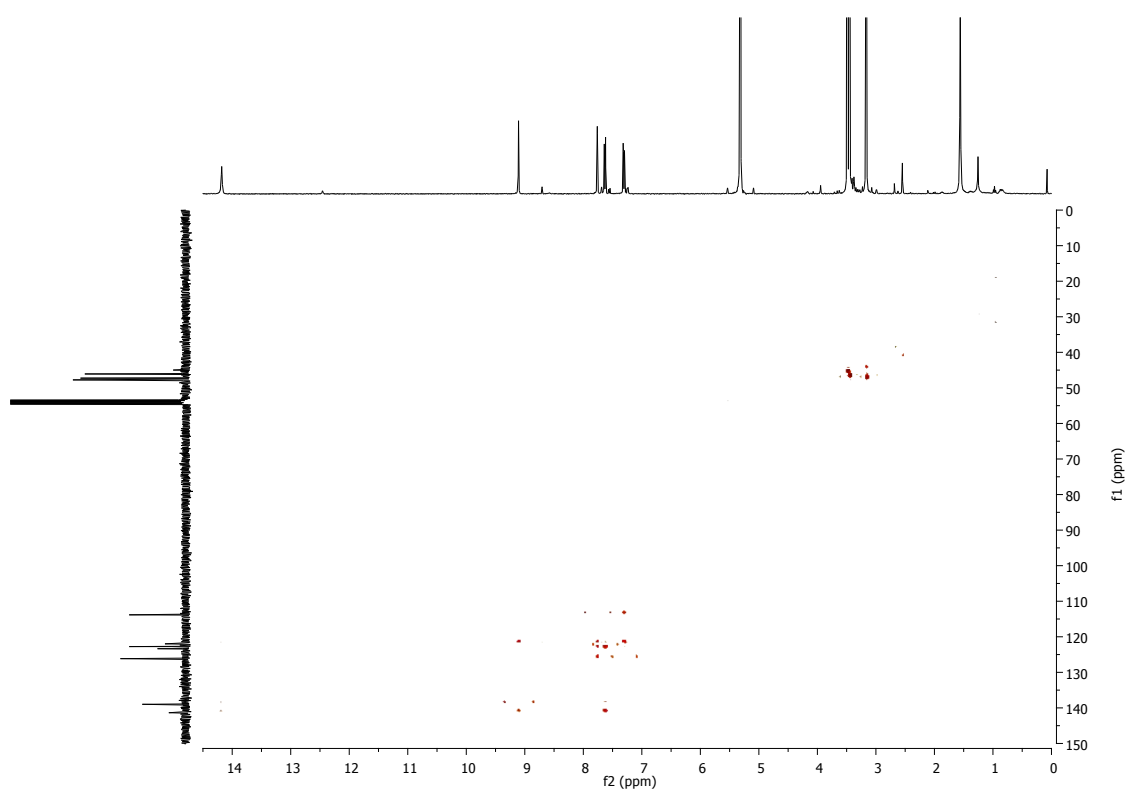



g)

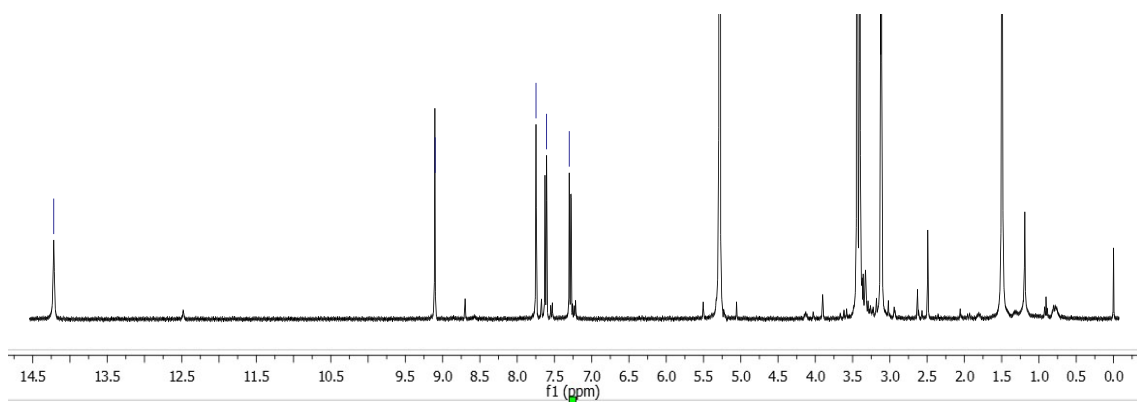

**Figure S5.** UV-visible spectra of **2** (blue), **3** (green), **4** (grey) and **5** (red) in  $\text{CH}_2\text{Cl}_2$

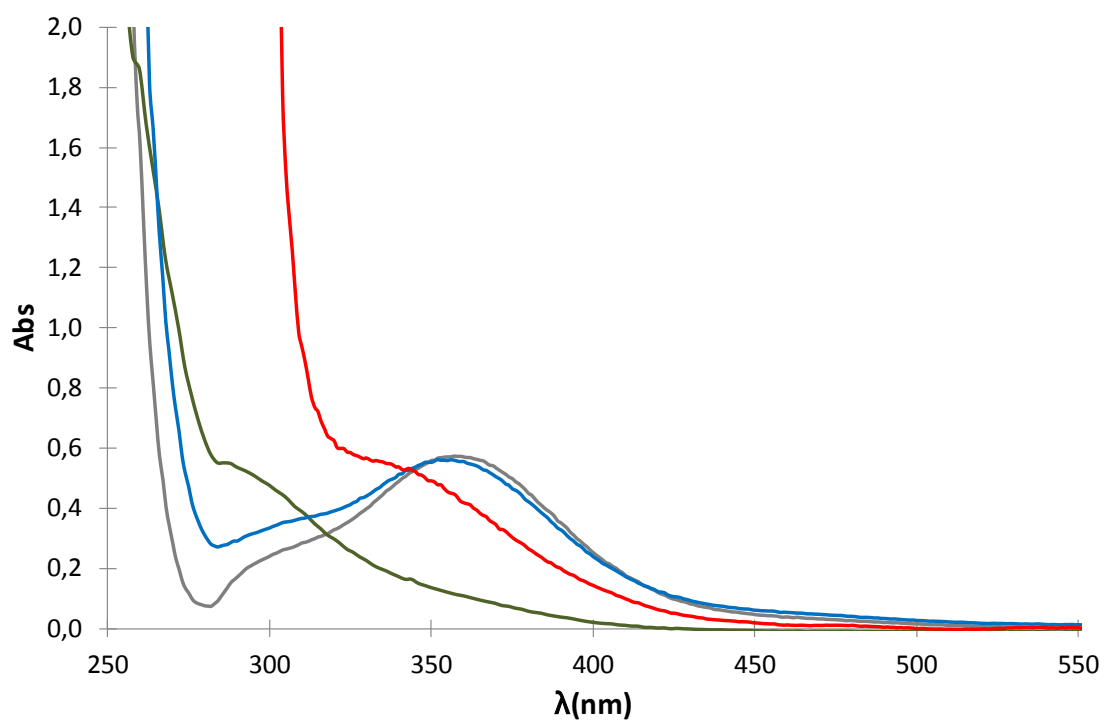

**Figure S6.** CV of a) **3** (blue), **4** (black) and **5** (orange) in  $\text{CH}_3\text{CN} + 0.1 \text{ M TBAH}$ .

a)

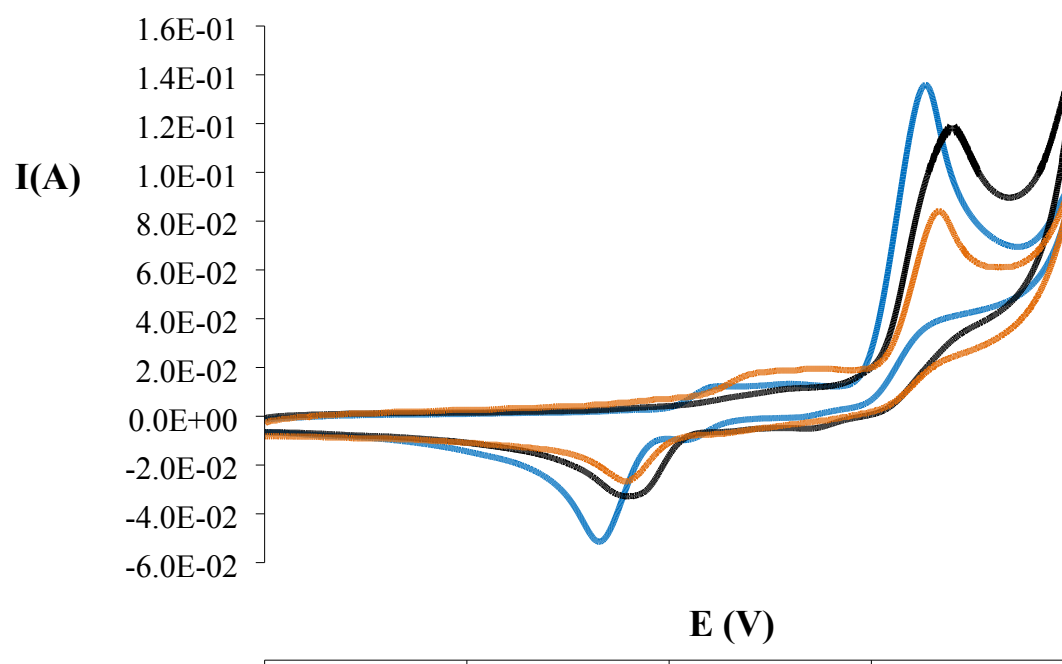

**Figure S7.** CV registered in CH<sub>2</sub>Cl<sub>2</sub> (TBAH, 0.1M) vs Ag/AgCl starting the scanning potential at  $E_{\text{init}} = 0.6$  for **2** and 0 V for **6** at scan rates between 0.20 and 8 V/s (equilibration time = 2 s). a) complex **2**, b) complex **6**.

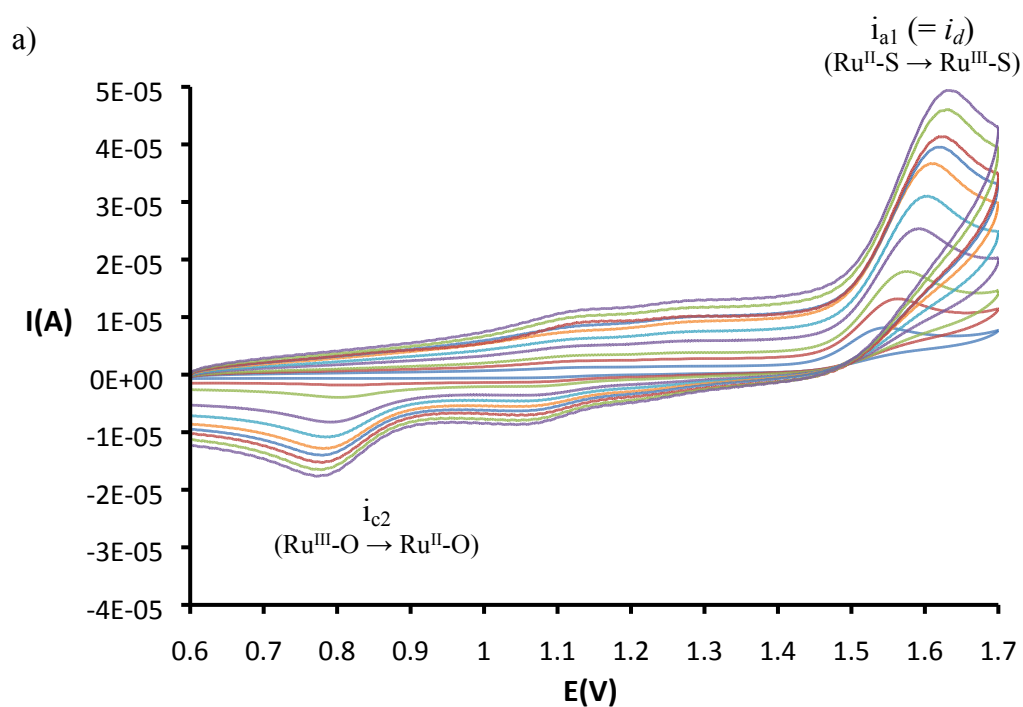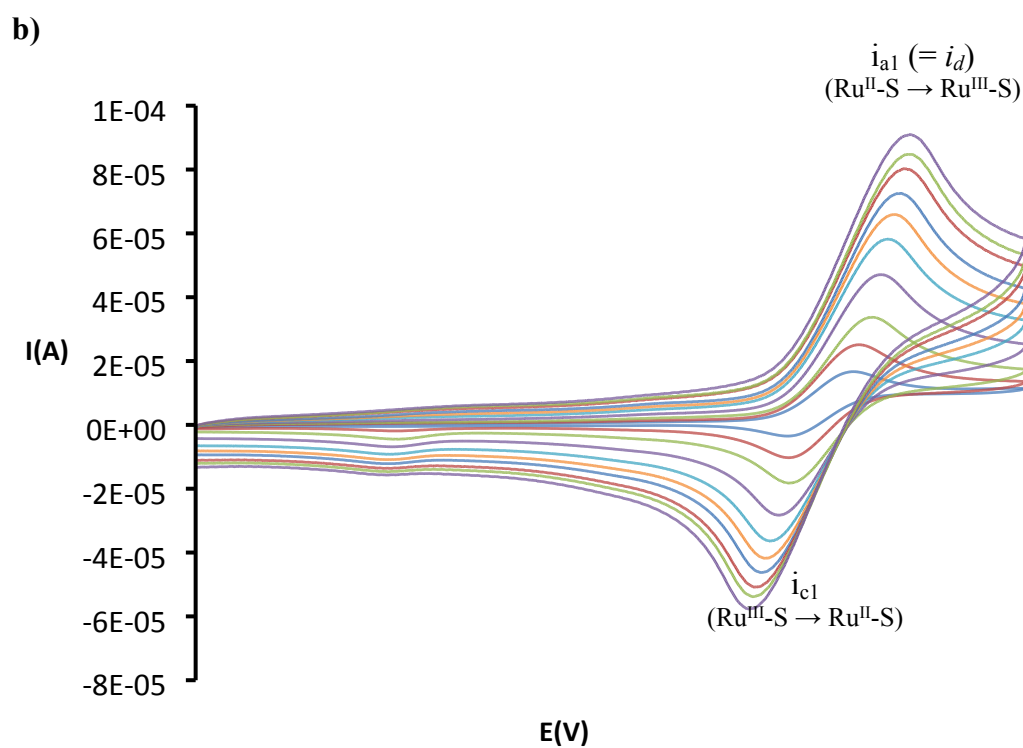

**Figure S8.** Plot of  $i_{C1}/i_{C2}$  vs.  $1/v$  to obtain  $K^{III}_{O-S}$  for complex **2**.

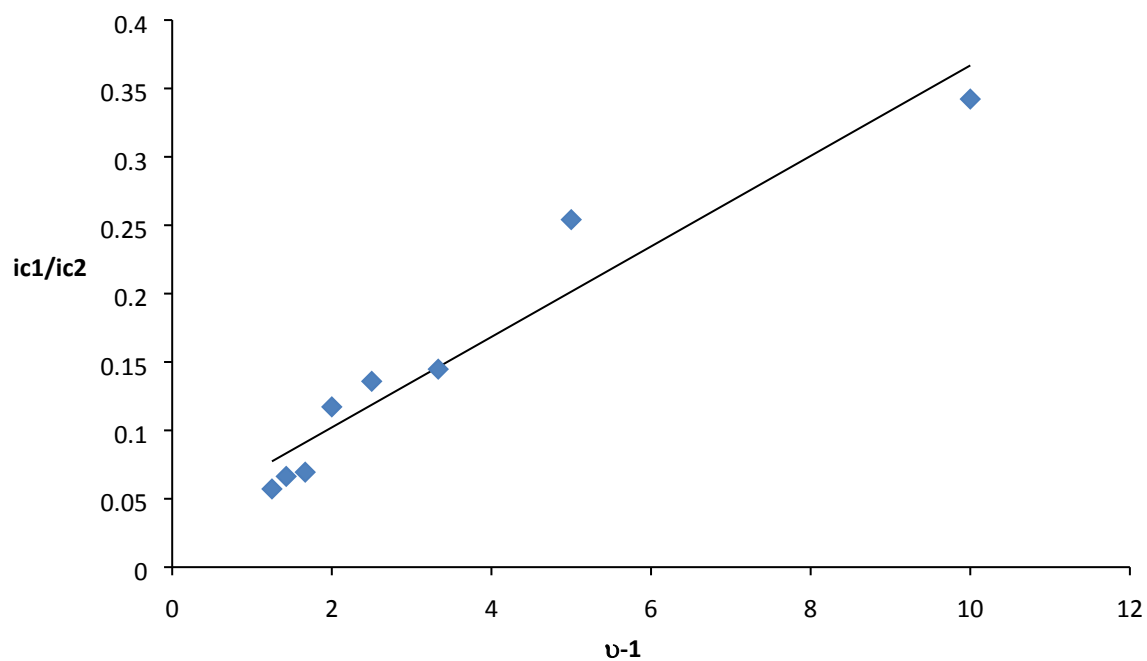

**Figure S9.** Plot of  $i_{C1}/i_{C2}$  vs.  $1/v$  to obtain  $K^{III}_{O-S}$  for complex **6**.

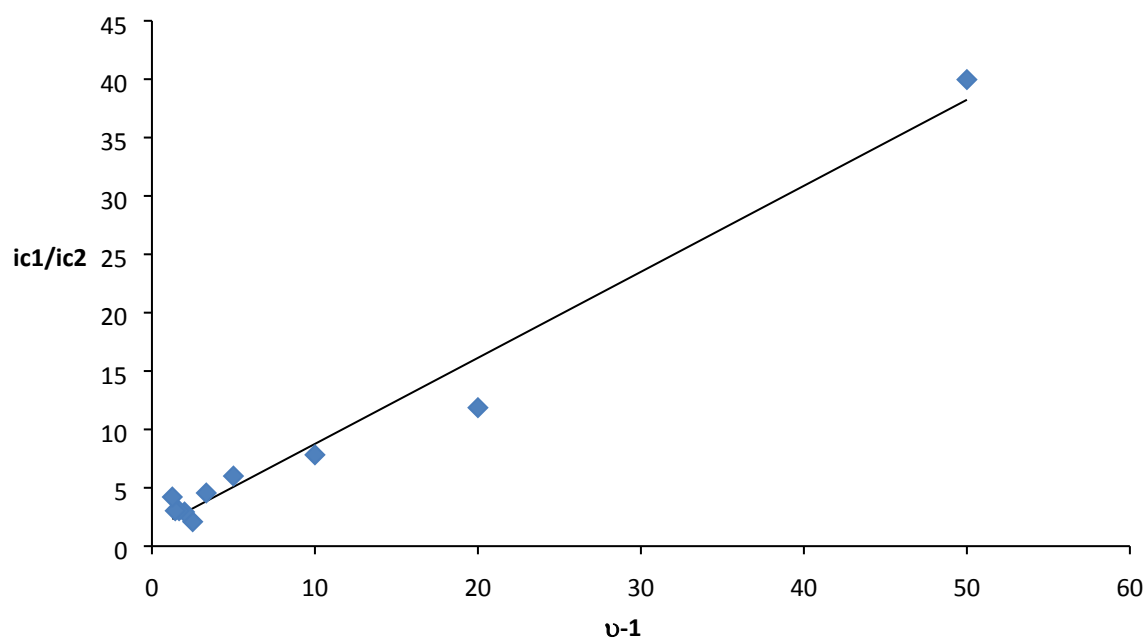

**Figure S10.** Plot of  $\nu^{1/2}$  vs.  $i_d/i_k$  to obtain  $k_{S \rightarrow O}^{III}$  and  $k_{O \rightarrow S}^{III}$  for complex **2**.

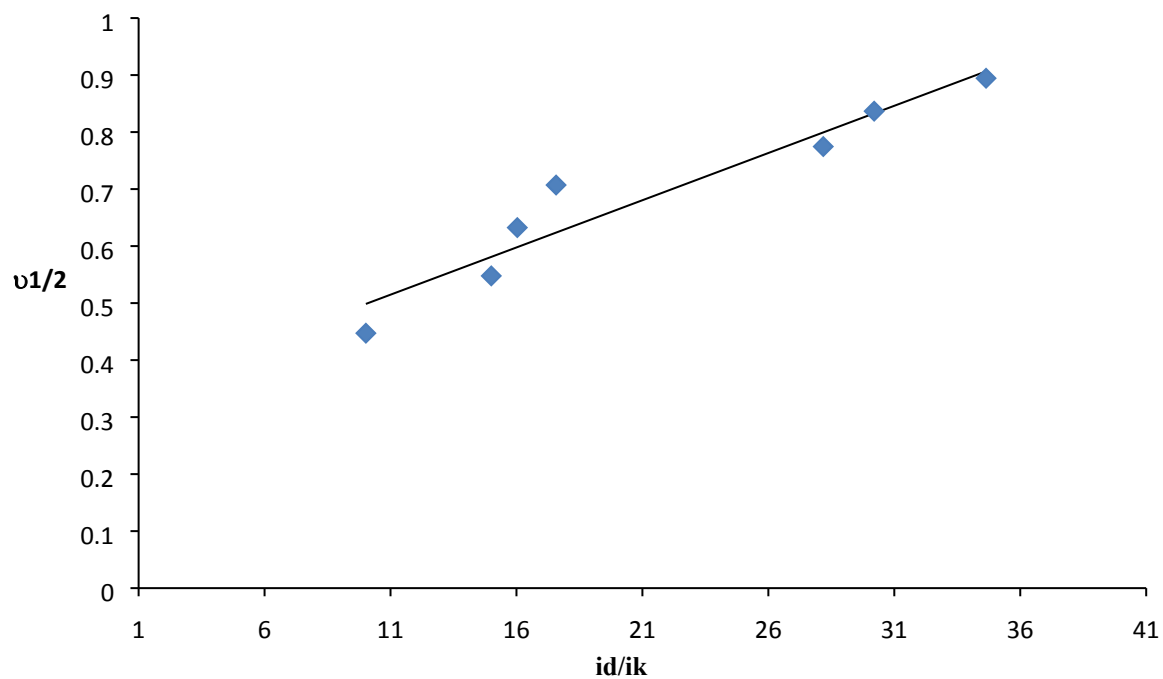

**Figure S11.** Plot of  $\nu^{1/2}$  vs.  $i_d/i_k$  to obtain  $k_{S \rightarrow O}^{III}$  and  $k_{O \rightarrow S}^{III}$  for complex **6**.

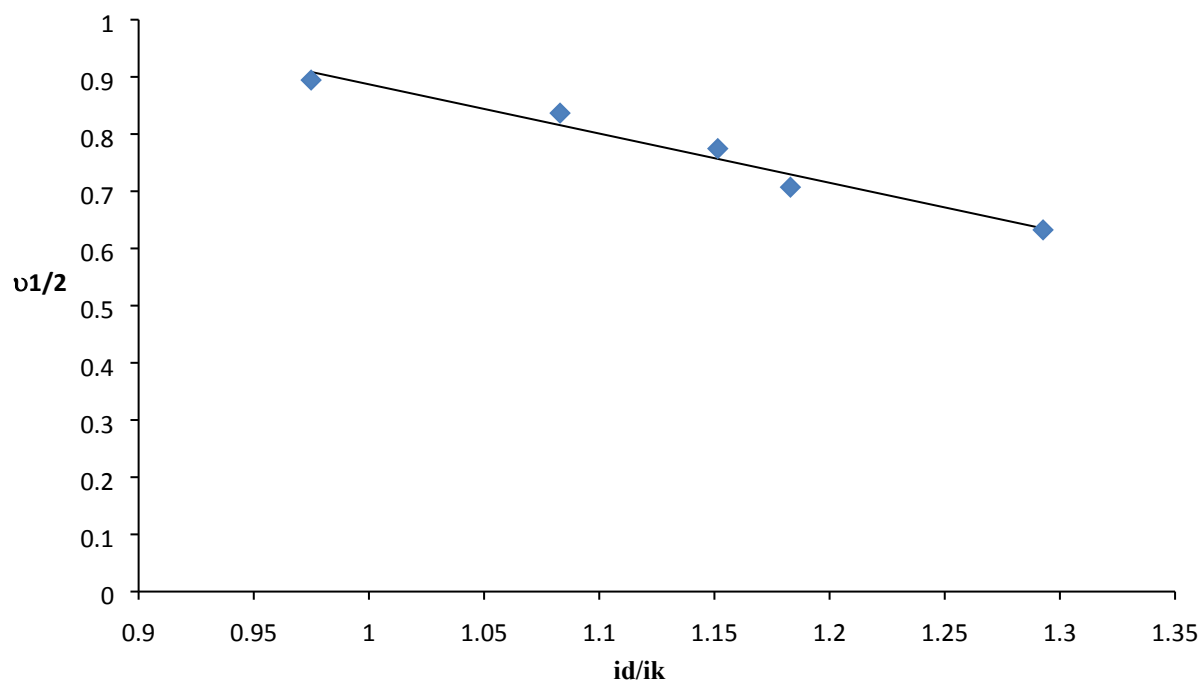

**Figure S12.** Plot of  $\ln(i_{a1}/\nu^{1/2})$  vs.  $1/\nu$  to obtain  $k_{O \rightarrow S}^{II}$  for complex **2**

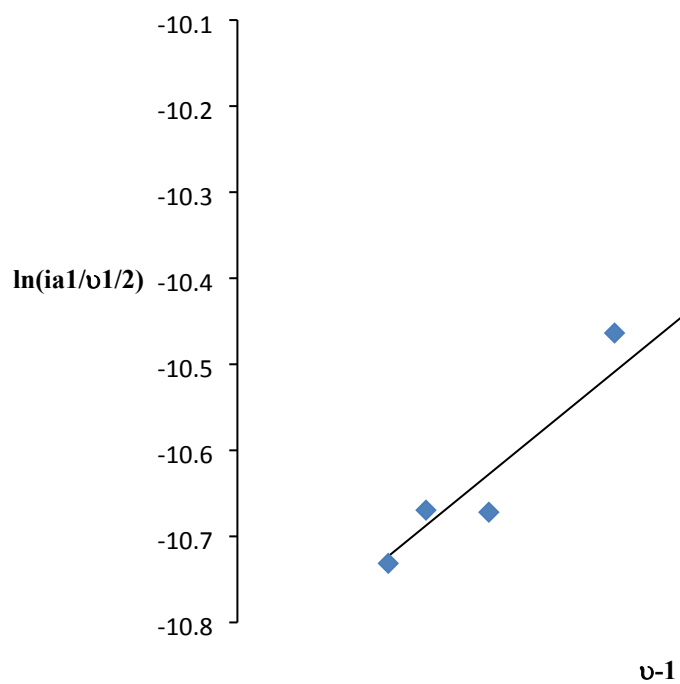

**Figure S13.** Plot of  $\ln(i_{a1}/\nu^{1/2})$  vs.  $1/\nu$  to obtain  $k_{O \rightarrow S}^{II}$  for complex **6**

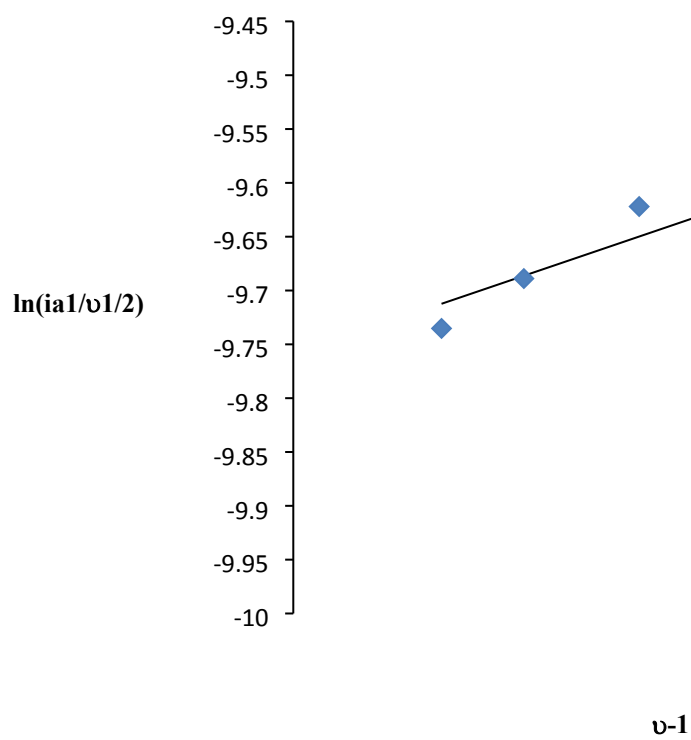

**Figure S14.** NMR spectra of **2** in CH<sub>3</sub>CN after irradiation at t = a) 0, b) 45 and c) 90 minutes.

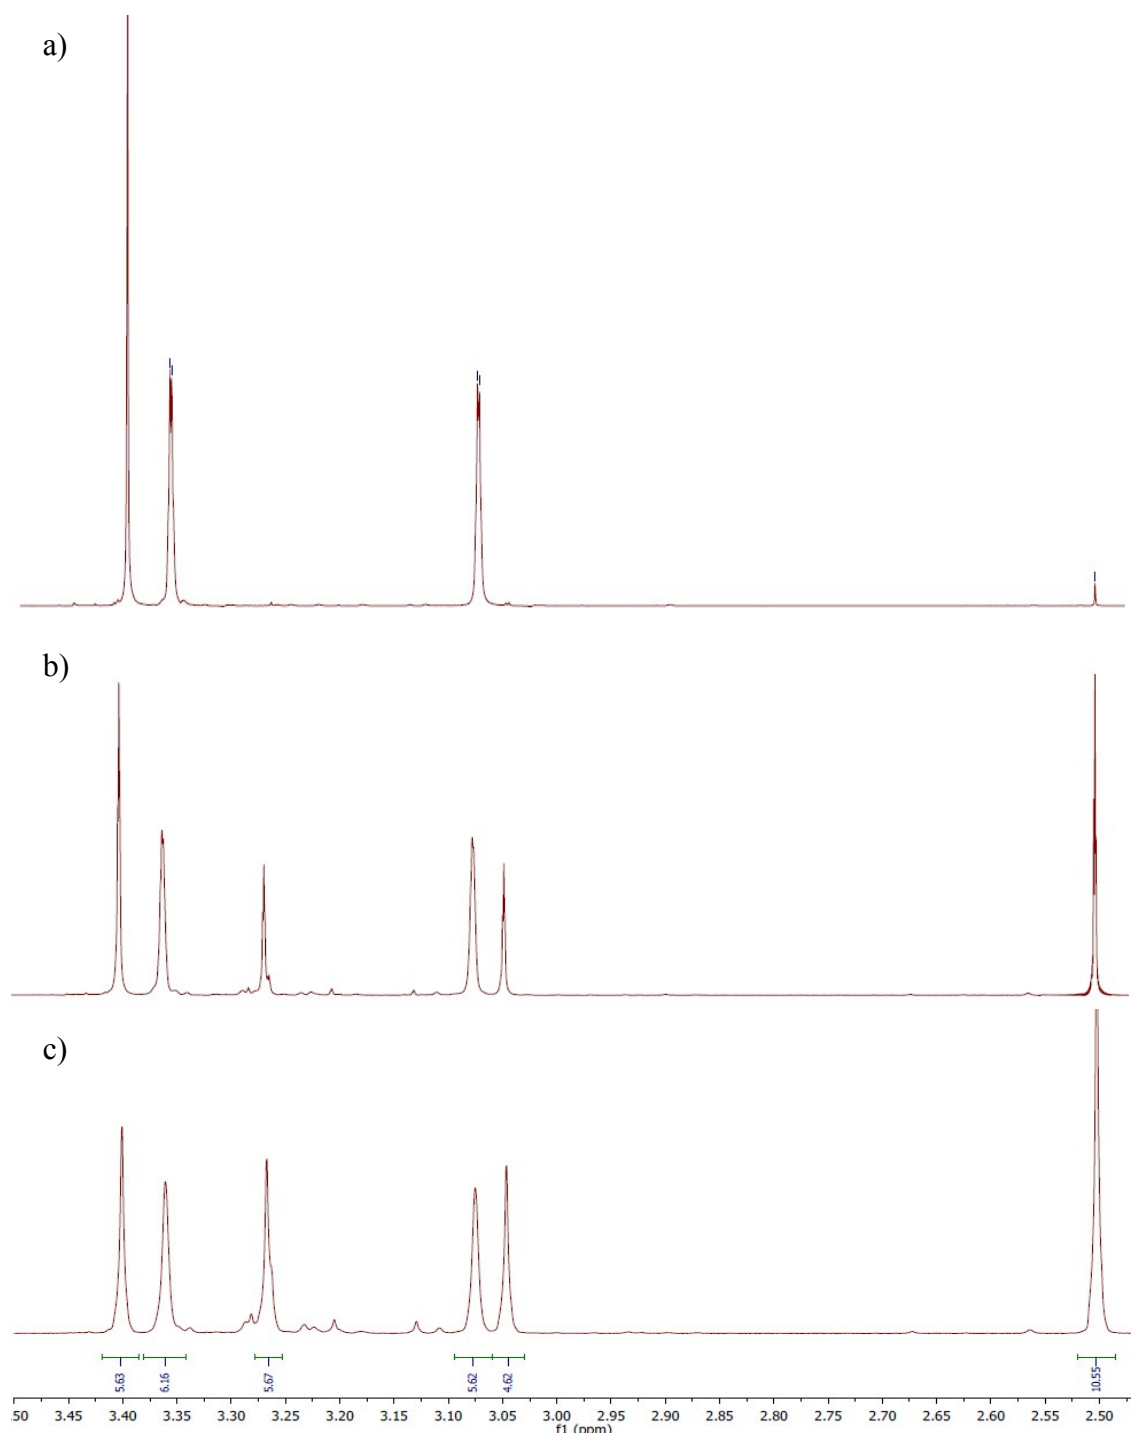

**Figure S15.** CV of **2** in CH<sub>3</sub>CN + 0.1 M TBAH after irradiation during 90 minutes.

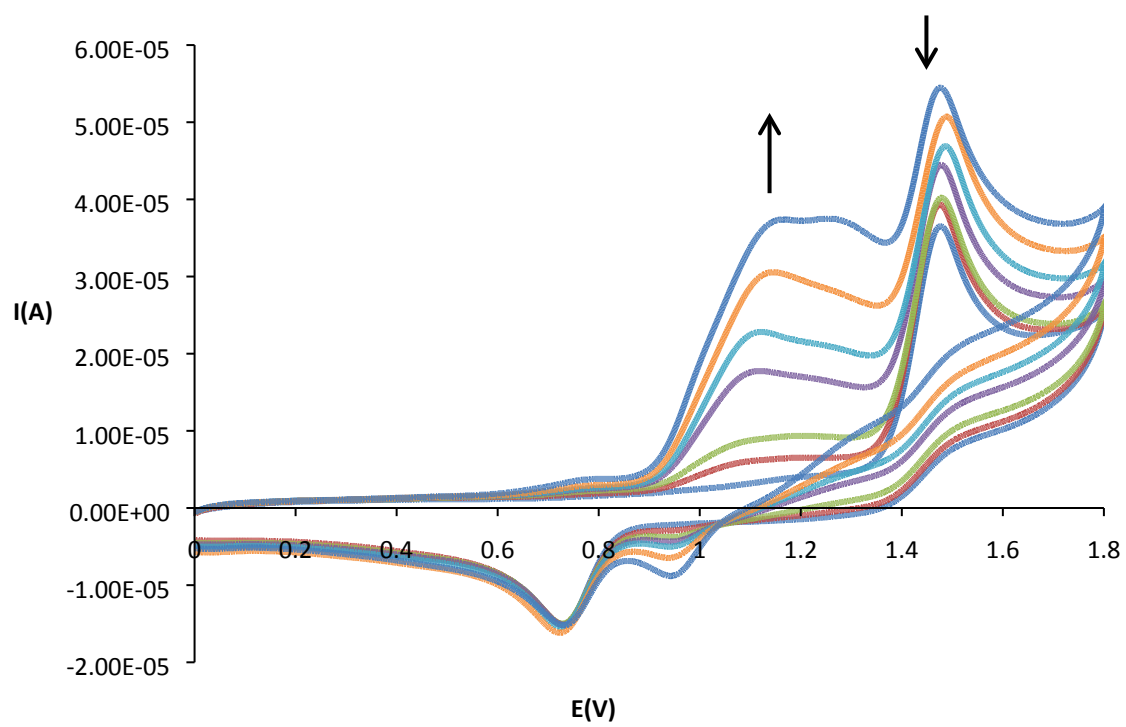



**Figure S16.** CV of **6'** in  $\text{CH}_2\text{Cl}_2 + 0.1 \text{ M TBAH}$ .

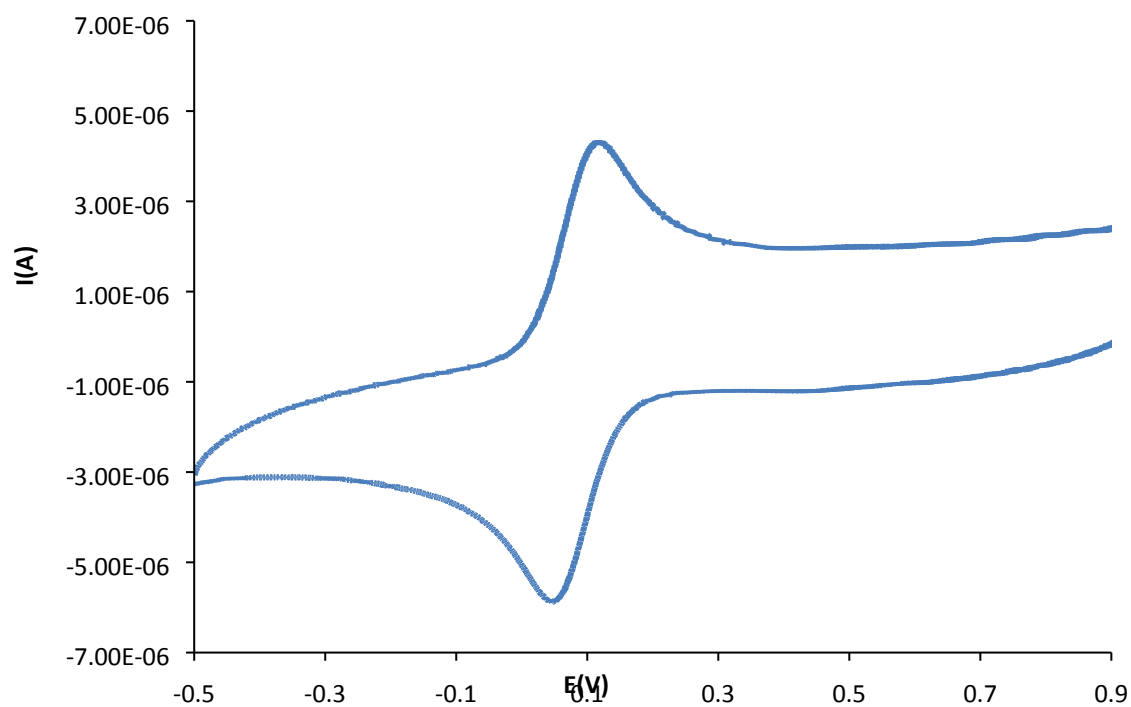

**Figure S17.** Successive UV-visible spectra obtained after irradiation of a solution of complex **6** in  $\text{CHCl}_3$  during 60 min, to generate complex **6'**.

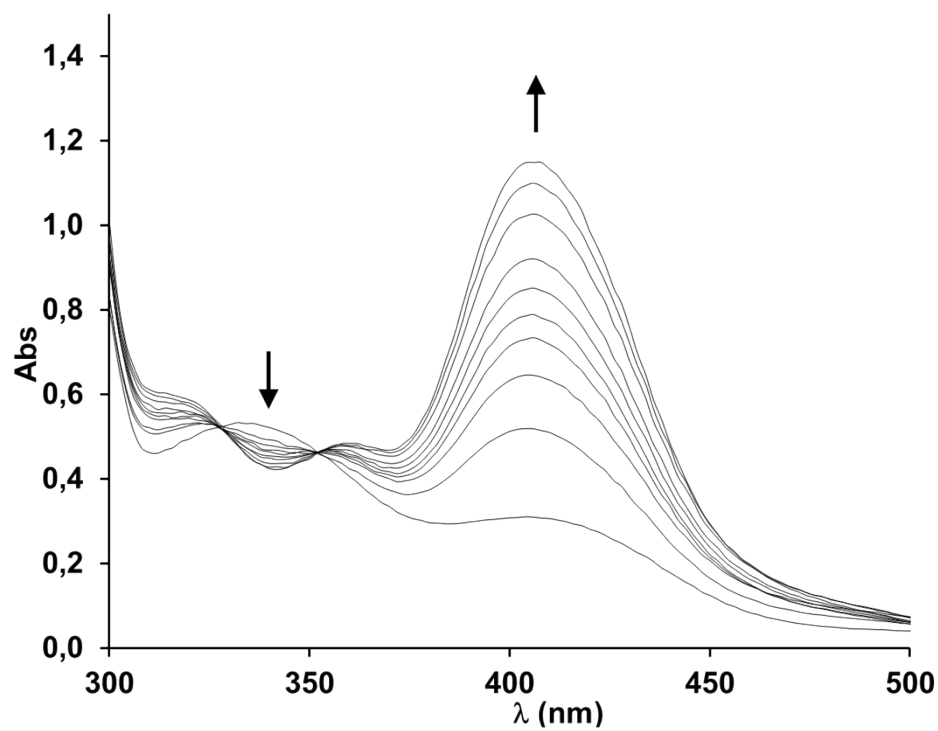

**Figure S18.** Successive UV-visible spectra obtained after irradiation of a solution of complex **2** in  $\text{CHCl}_3$  during 24 h, to generate complex **2''**.

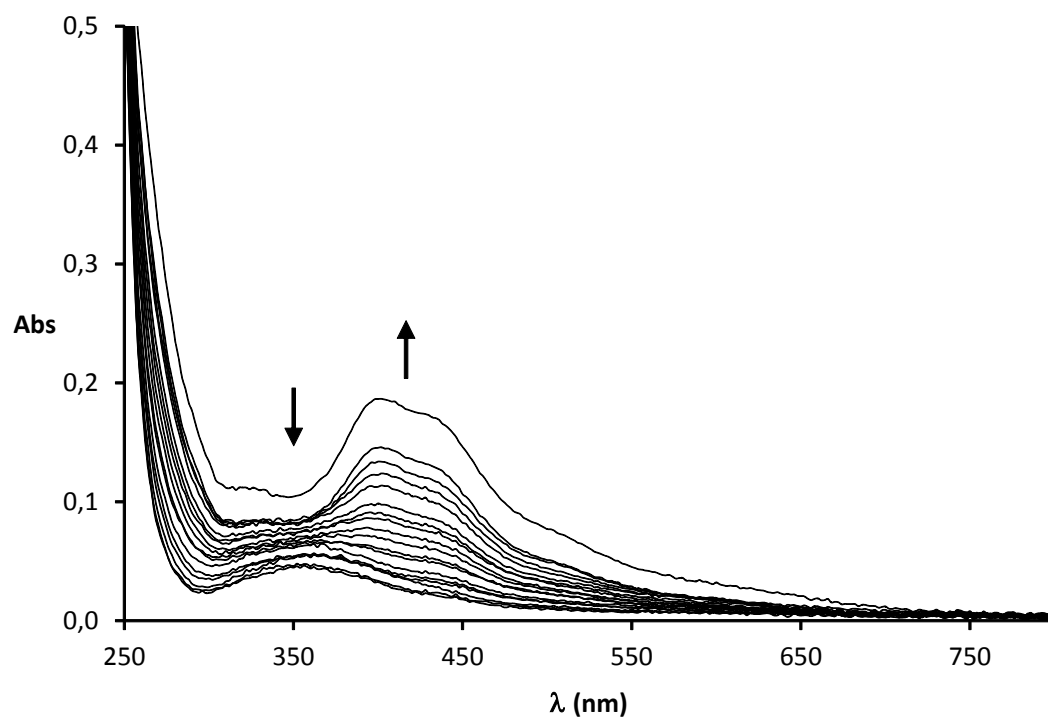

**Figure S19.** CV of **2''** in  $\text{CH}_2\text{Cl}_2 + 0.1$  M TBAH after irradiation.

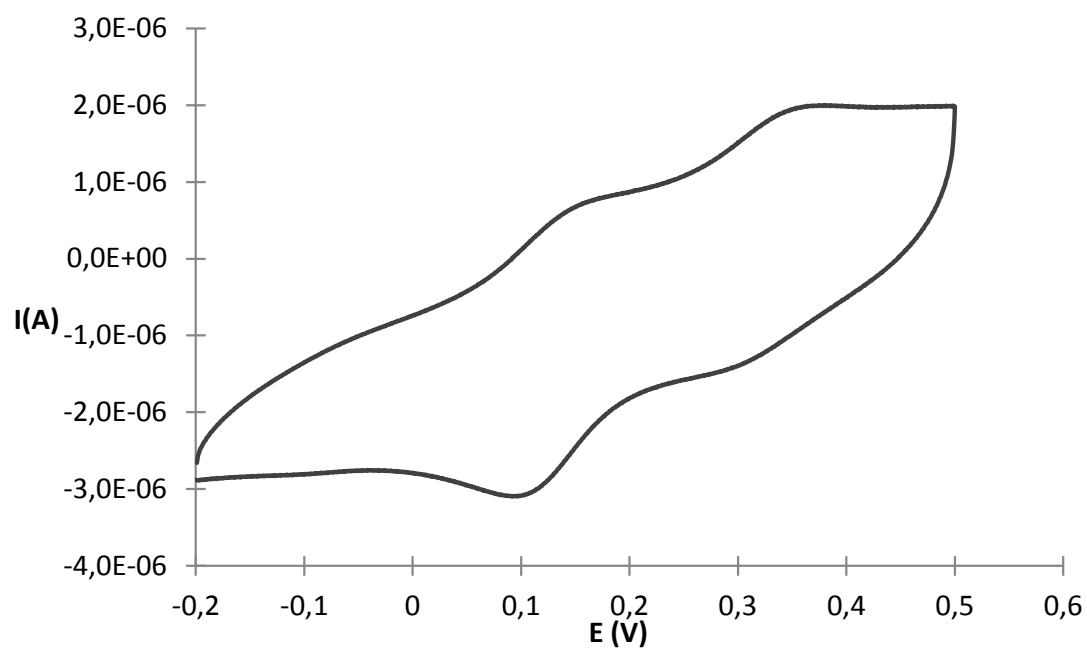

**Figure S20.** UV-vis monitoring of complex **2** in water at 80°C: main figure, spectra registered for 30 minutes; inset, evolution of the band at 516 nm up to 150 minutes.

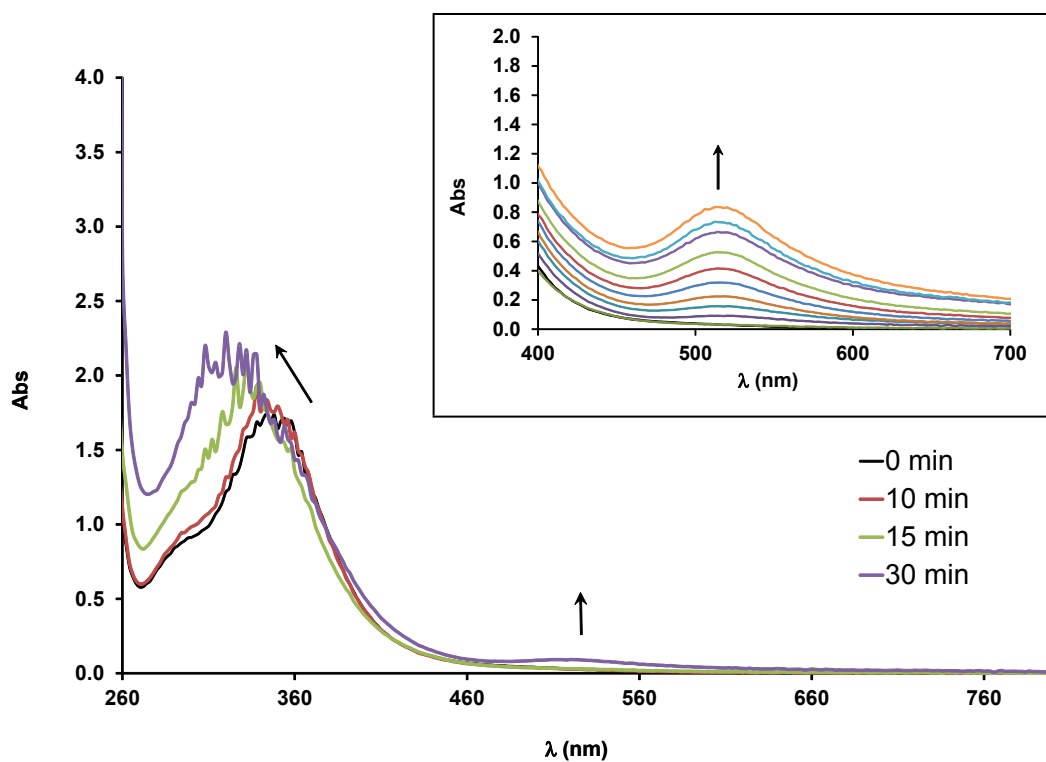

**Figure S21.** Red,  $^1\text{H}$ -NMR spectrum of complex **2** registered in  $\text{D}_2\text{O}$ . Black,  $^1\text{H}$ -NMR spectrum of complex **2** after 150 minutes in water solution at 80°C.

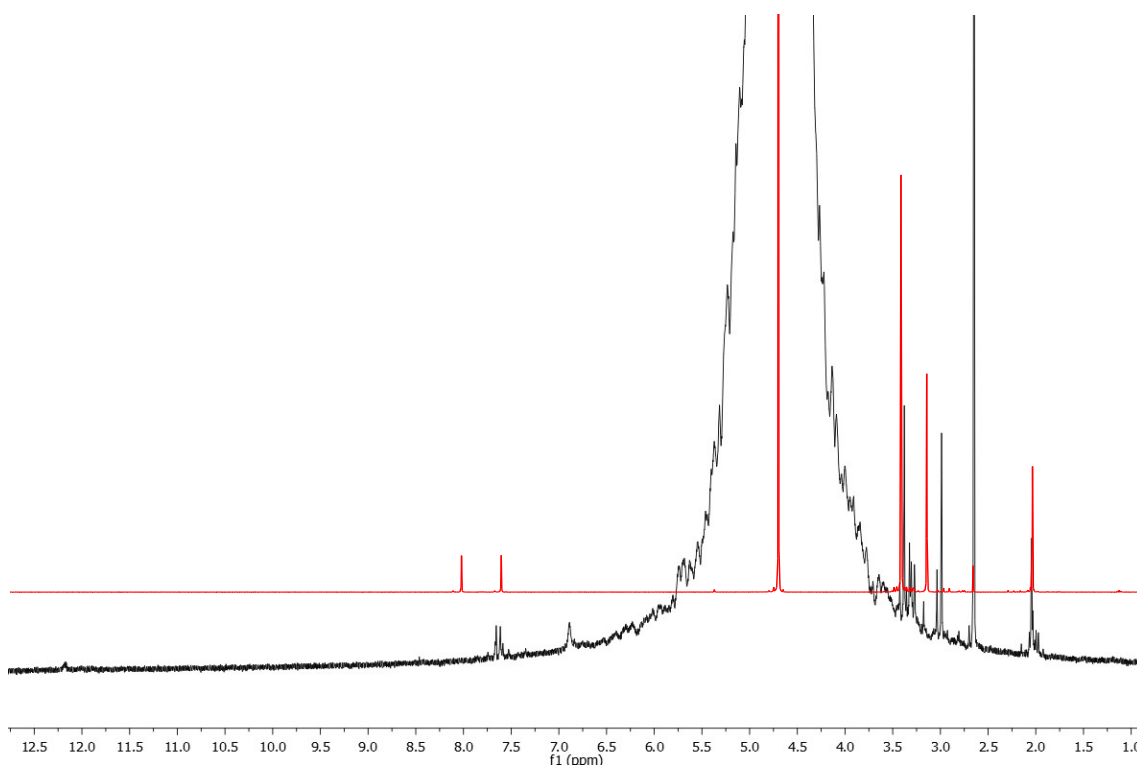

Supplement: c5dt04376j1.pdf [file c5dt04376j1.pdf]
